# Supplementary material for: Copper-promoted S-arylation reactions with triarylbismuths for the synthesis of diaryl sulfides
Source: Royal Society of Chemistry journal article supplement (doi:10.1039/d3ra06582k), 2023-01-01

## Electronic supplementary information

### Copper-promoted S-arylation reactions with triarylbismuths for the synthesis of diaryl sulfides

Mei Nie,<sup>a,b</sup> Xuehao Zhou,<sup>c</sup> Jingjie Tang,<sup>a,b</sup> Dongting Huang,<sup>a,b</sup> Xinsheng Xiao<sup>d</sup> and Jianwei Xie\*<sup>d</sup>

*<sup>a</sup>Institute of Biological and Medical Engineering, Guangdong Academy of Sciences, Guangzhou 510316, China*

*<sup>b</sup>Guangdong Province Engineering Research Center for Green Technology of Sugar Industry, Guangzhou 510316, China*

*<sup>c</sup>School of Chemistry and Chemical Engineering/The Key Laboratory for Green Processing of Chemical Engineering of Xinjiang Bingtuan, Shihezi University, Shihezi 832003, China*

*<sup>d</sup>College of Chemistry and Bioengineering, Hunan University of Science and Engineering, Yongzhou 425199, China. E-mail: cesxjw@foxmail.com*

### Table of contents

|                                                                                      |    |
|--------------------------------------------------------------------------------------|----|
| Characterization data of compound <b>3</b> , <b>6</b> and <b>7</b> .....             | 2  |
| References .....                                                                     | 12 |
| Copies of <sup>1</sup> NMR, <sup>13</sup> CNMR and <sup>19</sup> F NMR spectra ..... | 14 |

## Characterization data of compound 3, 6 and 7

### 2-(Phenylthio)pyridine 1-oxide (**3a**)<sup>1</sup>

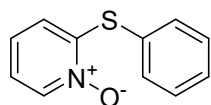

White solid, m.p.: 109-110°C, 58.6 mg, yield: 96% (Table 2) and 60.4 mg, yield: 99% (for Ar<sub>3</sub>Sb, Table 2); 57.9 mg, 95% (Table 4) and 58.6 mg, 96% (for Ar<sub>3</sub>Sb, Table 4).

<sup>1</sup>H NMR (400 MHz, CDCl<sub>3</sub>): δ 8.25 (d, *J* = 6.8 Hz, 1H), 7.63 (dd, *J* = 6.8, 1.8 Hz, 2H), 7.53-7.48 (m, 3H), 7.06-6.99 (m, 2H), 6.52 (dd, *J* = 7.9, 2.3 Hz, 1H).

<sup>13</sup>C NMR (101 MHz, CDCl<sub>3</sub>): δ 154.41, 138.50, 136.26, 130.56, 130.40, 128.63, 126.02, 122.21, 120.77.

### 2-(*O*-tolylthio)pyridine 1-oxide (**3b**)

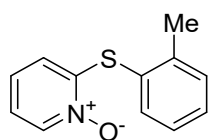

Yellow oil, 59.3 mg, yield: 91% (Table 2) and 56.1 mg, 86% (Table 4).

<sup>1</sup>H NMR (400 MHz, CDCl<sub>3</sub>): δ 8.29-8.27 (m, 1H), 7.60 (d, *J* = 7.5 Hz, 1H), 7.48-7.40 (m, 2H), 7.31 (td, *J* = 7.6, 2.0 Hz, 1H), 7.11-7.06 (m, 2H), 6.41 (dd, *J* = 7.5, 2.5 Hz, 1H), 2.41 (s, 3H).

<sup>13</sup>C NMR (101 MHz, CDCl<sub>3</sub>): δ 162.26, 152.51, 143.11, 138.28, 136.87, 131.23, 130.76, 127.46, 127.14, 125.94, 121.29, 120.46, 20.22.

HRMS (APCI) *m/z*: [M+H]<sup>+</sup> Calcd for C<sub>12</sub>H<sub>12</sub>NOS<sup>+</sup> 218.0634, found 218.0634.

### 2-(*M*-tolylthio)pyridine 1-oxide (**3c**)

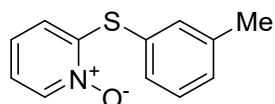

Yellow oil, 60.6 mg, yield: 93% (Table 2); 61.9 mg, 95% (for Ar<sub>3</sub>Sb, Table 2); 64.5 mg, 99% (Table 4), and 45.6 mg, 70% (for Ar<sub>3</sub>Sb, Table 4).

<sup>1</sup>H NMR (400 MHz, CDCl<sub>3</sub>): δ 8.22 (s, 1H), 7.42 (d, *J* = 10.8 Hz, 2H), 7.38 (t, *J* = 7.4

Hz, 1H), 7.32 (d,  $J = 7.4$  Hz, 1H), 7.01 (d,  $J = 5.1$  Hz, 2H), 6.57-6.54 (m, 1H), 2.39 (s, 3H).

$^{13}\text{C}$  NMR (101 MHz,  $\text{CDCl}_3$ ):  $\delta$  154.64, 140.45, 138.59, 136.70, 133.21, 131.36, 130.20, 128.23, 126.12, 122.18, 120.59, 21.41.

HRMS (APCI)  $m/z$ :  $[\text{M}+\text{H}]^+$  Calcd for  $\text{C}_{12}\text{H}_{12}\text{NOS}^+$  218.0634, found 218.0634.

### 2-(*p*-Tolylthio)pyridine 1-oxide (**3d**)<sup>1</sup>

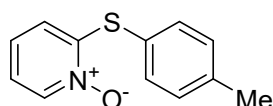

White solid, m.p.: 144-145 °C, 60.6 mg, yield: 93% (Table 2) and 63.9 mg, 98% (Table 4).

$^1\text{H}$  NMR (400 MHz,  $\text{CDCl}_3$ ):  $\delta$  8.22 (d,  $J = 5.6$  Hz, 1H), 7.50 (d,  $J = 8.0$  Hz, 2H), 7.29 (d,  $J = 8.0$  Hz, 2H), 7.03-6.97 (m, 2H), 6.53 (dd,  $J = 7.6, 2.4$  Hz, 1H), 2.42 (s, 3H).

$^{13}\text{C}$  NMR (101 MHz,  $\text{CDCl}_3$ ):  $\delta$  154.73, 140.95, 138.51, 136.17, 131.18, 125.82, 125.05, 122.14, 120.59, 21.52.

### 2-((2,4-Dimethylphenyl)thio)pyridine 1-oxide (**3e**)

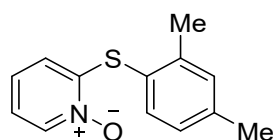

Yellow oil, 62.5 mg, yield: 90% (Table 2) and 62.5 mg, 90% (Table 4).

$^1\text{H}$  NMR (400 MHz,  $\text{CDCl}_3$ ):  $\delta$  8.21 (d,  $J = 6.6$  Hz, 1H), 7.44 (d,  $J = 7.8$  Hz, 1H), 7.19 (s, 1H), 7.07 (d,  $J = 7.8$  Hz, 1H), 7.02-6.94 (m, 2H), 6.37 (dd,  $J = 8.0, 2.1$  Hz, 1H), 2.36 (s, 3H), 2.33 (s, 3H).

$^{13}\text{C}$  NMR (101 MHz,  $\text{CDCl}_3$ ):  $\delta$  153.36, 143.28, 141.37, 138.64, 137.16, 132.37, 128.58, 125.86, 124.08, 121.59, 120.48, 21.34, 20.49.

HRMS (APCI)  $m/z$ :  $[\text{M}+\text{H}]^+$  Calcd for  $\text{C}_{13}\text{H}_{14}\text{NOS}^+$  232.0790, found 232.0790

### 2-((2-Methoxyphenyl)thio)pyridine 1-oxide (**3f**)<sup>1</sup>

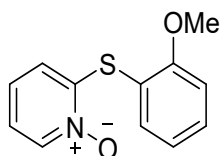

Red solid, m.p.: 111-113 °C, 60.2 mg, yield: 86% (Table 2) and 64.4 mg, 92% (Table 4).

$^1\text{H}$  NMR (400 MHz,  $\text{CDCl}_3$ ):  $\delta$  8.17 (d,  $J = 6.1$  Hz, 1H), 7.54 (dd,  $J = 7.8, 1.8$  Hz, 1H), 7.47 (td,  $J = 7.9, 1.7$  Hz, 1H), 7.01-6.93 (m, 4H), 6.45 (dd,  $J = 8.0, 2.0$  Hz, 1H), 3.76 (s, 3H).

$^{13}\text{C}$  NMR (101 MHz,  $\text{CDCl}_3$ ):  $\delta$  160.31, 152.74, 138.41, 137.82, 132.68, 125.72, 121.93, 121.77, 120.44, 116.00, 111.91, 55.92.

#### 2-((3-Methoxyphenyl)thio)pyridine 1-oxide (**3g**)

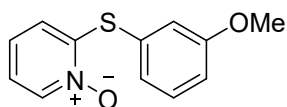

White solid, m.p.: 107-109°C, 69.3 mg, yield: 99% (Table 2) and 66.5 mg, 95% (Table 4).

$^1\text{H}$  NMR (400 MHz,  $\text{CDCl}_3$ ):  $\delta$  8.22 (dd,  $J = 6.3, 1.5$  Hz, 1H), 7.40 (t,  $J = 8.0$  Hz, 1H), 7.20 (d,  $J = 7.6$  Hz, 1H), 7.15 (t,  $J = 2.1$  Hz, 1H), 7.06-6.97 (m, 3H), 6.58 (dd,  $J = 8.0, 2.1$  Hz, 1H), 3.82 (s, 3H).

$^{13}\text{C}$  NMR (101 MHz,  $\text{CDCl}_3$ ):  $\delta$  160.78, 154.27, 138.44, 131.19, 129.63, 128.26, 125.93, 122.30, 121.00, 120.78, 116.58, 55.60.

HRMS (APCI)  $m/z$ :  $[\text{M}+\text{H}]^+$  Calcd for  $\text{C}_{12}\text{H}_{12}\text{NO}_2\text{S}^+$  234.0583, found 234.0582.

#### 2-((4-Methoxyphenyl)thio)pyridine 1-oxide (**3h**)<sup>1</sup>

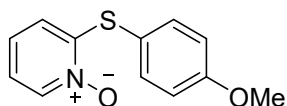

White solid, m.p.: 193-194 °C, 63 mg, yield: 90% (Table 2) and 64.4 mg, 92% (Table 4).

$^1\text{H}$  NMR (400 MHz,  $\text{CDCl}_3$ ):  $\delta$  8.23 (d,  $J = 6.0$  Hz, 1H), 7.53 (d,  $J = 8.7$  Hz, 2H), 7.05-6.97 (m, 4H), 6.52 (dd,  $J = 8.0, 2.1$  Hz, 1H), 3.87 (s, 3H).

$^{13}\text{C}$  NMR (101 MHz,  $\text{CDCl}_3$ ):  $\delta$  161.53, 155.03, 138.52, 137.84, 125.84, 122.10, 120.58, 118.91, 115.97, 55.62.

2-((4-(Tert-butyl)phenyl)thio)pyridine 1-oxide (**3i**)

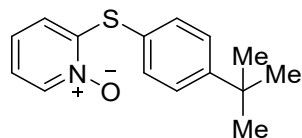

Yellow oil, 65.4 mg, yield: 84% (Table 2) and 41.2 mg, 53% (Table 4).

$^1\text{H}$  NMR (400 MHz,  $\text{CDCl}_3$ ):  $\delta$  8.20 (d,  $J = 6.1$  Hz, 1H), 7.49 (q,  $J = 8.4$  Hz, 4H), 7.04-6.95 (m, 2H), 6.54 (d,  $J = 9.5$  Hz, 1H), 1.33 (s, 9H).

$^{13}\text{C}$  NMR (101 MHz,  $\text{CDCl}_3$ ):  $\delta$  154.53, 153.96, 138.41, 135.82, 127.40, 125.87, 124.90, 122.15, 120.57, 34.96, 31.25.

HRMS (APCI)  $m/z$ :  $[\text{M}+\text{H}]^+$  Calcd for  $\text{C}_{15}\text{H}_{18}\text{NOS}^+$  260.1104, found 260.1103.

2-((3-Fluorophenyl)thio)pyridine 1-oxide (**3j**)

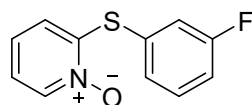

White solid, m.p.: 107-108 °C, 63.7 mg, yield: 96% (Table 2), 55.7 mg, 84% (Table 8) and 50.4 mg, 76% (for  $\text{Ar}_3\text{Sb}$ , Table 4)

$^1\text{H}$  NMR (400 MHz,  $\text{CDCl}_3$ ):  $\delta$  8.23 (d,  $J = 5.2$  Hz, 1H), 7.51-7.45 (m, 1H), 7.42 (d,  $J = 7.6$  Hz, 1H), 7.35 (dt,  $J = 8.3, 2.0$  Hz, 1H), 7.22 (td,  $J = 8.3, 1.6$  Hz, 1H), 7.08-7.01 (m, 2H), 6.58-6.55 (m, 1H).

$^{13}\text{C}$  NMR (101 MHz,  $\text{CDCl}_3$ ):  $\delta$  163.20 (d,  $J = 251.3$  Hz), 153.57, 138.57, 131.91 (d,  $J = 3.3$  Hz), 131.76 (d,  $J = 8.2$  Hz), 130.71 (d,  $J = 7.5$  Hz), 126.08, 122.93 (d,  $J = 21.6$  Hz), 122.09, 121.09, 117.84 (d,  $J = 20.8$  Hz).

$^{19}\text{F}$  NMR (376 MHz,  $\text{CDCl}_3$ ):  $\delta$  -109.85.

HRMS (APCI)  $m/z$ :  $[\text{M}+\text{H}]^+$  Calcd for  $\text{C}_{11}\text{H}_9\text{FNOS}^+$  222.0383, found 222.0381.

2-((4-Fluorophenyl)thio)pyridine 1-oxide (**3k**)<sup>1</sup>

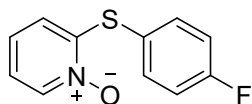

White solid, m.p.: 145-146 °C, 65.7 mg, yield: 99% (Table 2).

$^1\text{H}$  NMR (400 MHz,  $\text{CDCl}_3$ ):  $\delta$  8.24 (dd,  $J = 6.1, 1.5$  Hz, 1H), 7.63-7.60 (m, 2H), 7.20 (t,  $J = 8.4$  Hz, 2H), 7.08-7.00 (m, 2H), 6.50 (dd,  $J = 8.0, 2.4$  Hz, 1H).

$^{13}\text{C}$  NMR (101 MHz,  $\text{CDCl}_3$ ):  $\delta$  164.26 (d,  $J = 252.0$  Hz), 154.15, 138.55, 138.42 (d,  $J = 8.7$  Hz), 125.91, 124.05 (d,  $J = 3.6$  Hz), 122.01, 120.94, 117.74 (d,  $J = 22.0$  Hz).

$^{19}\text{F}$  NMR (376 MHz,  $\text{CDCl}_3$ )  $\delta$  -109.23.

### 2-((4-Chlorophenyl)thio)pyridine 1-oxide (**3l**)<sup>1</sup>

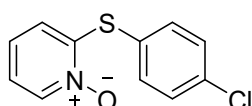

White solid, m.p.: 174-175 °C, 65.6 mg, yield: 92% (Table 2); 66.3 mg, 93% (for  $\text{Ar}_3\text{Sb}$ , Table 2); 50.6 mg, 71% (Table 4) and 64.2 mg, 90% (for  $\text{Ar}_3\text{Sb}$ , Table 4)

$^1\text{H}$  NMR (400 MHz,  $\text{CDCl}_3$ ):  $\delta$  8.23 (d,  $J = 5.6$  Hz, 1H), 7.58-7.54 (m, 2H), 7.49-7.46 (m, 2H), 7.07-7.01 (m, 2H), 6.54-6.52 (m, 1H).

$^{13}\text{C}$  NMR (101 MHz,  $\text{CDCl}_3$ ):  $\delta$  153.72, 138.58, 137.50, 137.16, 130.69, 127.28, 125.91, 122.06, 121.03.

### 2-([1,1'-Biphenyl]-4-ylthio)pyridine 1-oxide (**3m**)<sup>1</sup>

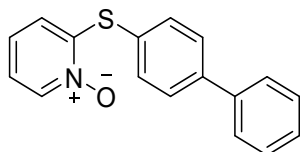

White solid, m.p.: 193-194 °C, 57 mg, yield: 68% (Table 2) and 74.6 mg, 89% (Table 4).

$^1\text{H}$  NMR (400 MHz,  $\text{CDCl}_3$ ):  $\delta$  8.27 (d,  $J = 6.2$  Hz, 1H), 7.74-7.69 (m, 4H), 7.64 (d,  $J = 7.4$  Hz, 2H), 7.49 (t,  $J = 7.5$  Hz, 2H), 7.42 (t,  $J = 7.3$  Hz, 1H), 7.10-7.01 (m, 2H), 6.65 (dd,  $J = 8.0, 2.1$  Hz, 1H).

$^{13}\text{C}$  NMR (101 MHz,  $\text{CDCl}_3$ ):  $\delta$  154.40, 143.51, 139.80, 138.58, 136.62, 129.16, 129.02, 128.30, 127.37, 127.30, 126.04, 122.31, 120.82.

2-((4-(Trifluoromethyl)phenyl)thio)pyridine 1-oxide (**3n**)<sup>1</sup>

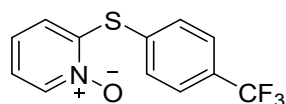

White solid, m.p.: 145-146 °C, 61 mg, yield: 75% (Table 2).

<sup>1</sup>H NMR (400 MHz, CDCl<sub>3</sub>): δ 8.27 (s, 1H), 7.79-7.74 (m, 4H), 7.08-7.07 (m, 2H), 6.58 (t, *J* = 4.8 Hz, 1H).

<sup>13</sup>C NMR (101 MHz, DMSO-*d*<sub>6</sub>): δ 150.55, 138.22, 136.17, 134.12 (d, *J* = 1.3 Hz), 130.43 (d, *J* = 32.2 Hz), 127.11 (q, *J* = 3.7 Hz), 126.04, 125.27, 122.56, 122.44 (d, *J* = 13.0 Hz).

<sup>19</sup>F NMR (376 MHz, CDCl<sub>3</sub>): δ -62.97.

2-((3-(Diethoxymethyl)phenyl)thio)pyridine 1-oxide (**3o**)<sup>2</sup>

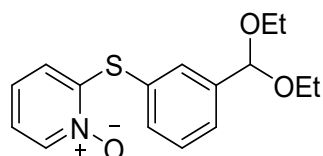

Green solid, easily decomposed, 88 mg, yield: 96% (Table 2).

<sup>1</sup>H NMR (400 MHz, CDCl<sub>3</sub>): δ 8.22 (d, *J* = 5.6 Hz, 1H), 7.73 (s, 1H), 7.62 (d, *J* = 7.6 Hz, 1H), 7.56 (d, *J* = 7.7 Hz, 1H), 7.48 (t, *J* = 7.6 Hz, 1H), 7.04-6.98 (m, 2H), 6.51 (dd, *J* = 7.5, 2.5 Hz, 1H), 5.52 (s, 1H), 3.66 – 3.47 (m, 4H), 1.22 (t, *J* = 6.8 Hz, 6H).

<sup>13</sup>C NMR (101 MHz, CDCl<sub>3</sub>): δ 154.22, 141.76, 138.44, 135.98, 134.37, 130.22, 128.90, 128.56, 125.85, 122.20, 120.76, 100.75, 61.44, 15.27.

2-((3-Formylphenyl)thio)pyridine 1-oxide (**3p**)

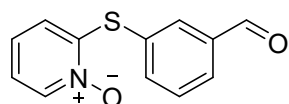

White solid, m.p.: 124-126 °C, 52.7 mg, yield: 76% (Table 2).

<sup>1</sup>H NMR (400 MHz, CDCl<sub>3</sub>): δ 10.04 (s, 1H), 8.25 (t, *J* = 4.0 Hz, 1H), 8.12 (s, 1H), 8.02 (d, *J* = 7.6 Hz, 1H), 7.88 (d, *J* = 7.6 Hz, 1H), 7.69 (t, *J* = 7.6 Hz, 1H), 7.06 (t, *J* = 4.4 Hz, 2H), 6.52 (t, *J* = 5.2 Hz, 1H).

<sup>13</sup>C NMR (101 MHz, CDCl<sub>3</sub>): δ 190.94, 153.28, 141.74, 138.68, 138.19, 137.14,

131.32, 131.12, 130.60, 126.20, 122.14, 121.29.

HRMS (APCI)  $m/z$ :  $[M+H]^+$  Calcd for  $C_{12}H_{10}NO_2S^+$  232.0427, found 232.0425.

2-(Naphthalen-1-ylthio)pyridine 1-oxide (**3q**)<sup>1</sup>

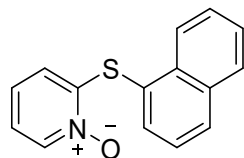

Brown solid, m.p.: 126-127 °C, 69.9 mg, yield: 92% (Table 2).

<sup>1</sup>H NMR (400 MHz, CDCl<sub>3</sub>): δ 8.26 (t,  $J = 7.4$  Hz, 2H), 8.02 (d,  $J = 8.3$  Hz, 1H), 7.93 (d,  $J = 7.1$  Hz, 2H), 7.57-7.49 (m, 3H), 6.97-6.93 (m, 1H), 6.84 (t,  $J = 7.8$  Hz, 1H), 6.17 (dd,  $J = 8.0, 1.4$  Hz, 1H).

<sup>13</sup>C NMR (101 MHz, CDCl<sub>3</sub>): δ 153.17, 138.53, 136.38, 134.47, 131.86, 128.94, 127.98, 127.04, 126.25, 125.83, 125.57, 125.43, 122.40, 120.66.

2-(Phenylthio)aniline (**6a**)<sup>2</sup>

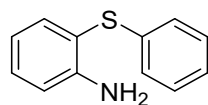

Green oil, 39.8 mg, yield: 66% (Table 5).

<sup>1</sup>H NMR (400 MHz, CDCl<sub>3</sub>): δ 7.37 (d,  $J = 7.6$  Hz, 1H), 7.17-7.11 (m, 3H), 7.04-6.99 (m, 3H), 6.71-6.65 (m, 2H), 4.14 (s, 2H).

<sup>13</sup>C NMR (101 MHz, CDCl<sub>3</sub>): δ 148.82, 137.56, 136.90, 131.23, 129.10, 126.58, 125.53, 118.90, 115.52, 114.53.

2-((3-Methoxyphenyl)thio)aniline (**6b**)<sup>3</sup>

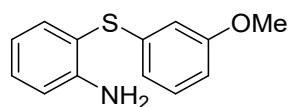

Black oil, 50 mg, yield: 72% (Table 5).

<sup>1</sup>H NMR (400 MHz, CDCl<sub>3</sub>): δ 7.43 (dd,  $J = 7.6, 1.2$  Hz, 1H), 7.21 (td,  $J = 8.0, 1.2$  Hz, 1H), 7.11 (t,  $J = 8.2$  Hz, 1H), 6.76-6.72 (m, 2H), 6.66-6.63 (m, 3H), 4.14 (s, 2H), 3.69 (s, 3H).



$^{13}\text{C}$  NMR (101 MHz,  $\text{CDCl}_3$ ):  $\delta$  160.12, 148.93, 138.35, 137.59, 131.31, 129.90, 128.84, 127.23, 118.81, 115.48, 114.17, 112.11, 111.06, 55.24.

2-((4-Chlorophenyl)thio)aniline (**6c**)<sup>3</sup>

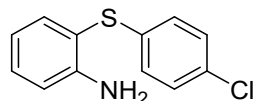

Red oil, 50.9 mg, yield: 72% (Table 5).

$^1\text{H}$  NMR (400 MHz,  $\text{CDCl}_3$ ):  $\delta$  7.43 (dd,  $J = 7.7, 1.3$  Hz, 1H), 7.23 (td,  $J = 7.7, 1.5$  Hz, 1H), 7.16 (d,  $J = 8.6$  Hz, 2H), 6.99 (d,  $J = 8.5$  Hz, 2H), 6.78-6.73 (m, 2H), 4.12 (s, 2H).

$^{13}\text{C}$  NMR (101 MHz,  $\text{CDCl}_3$ ):  $\delta$  148.81, 137.52, 135.54, 131.52, 131.34, 129.17, 127.79, 118.99, 115.59, 114.00.

2-((4-(Trifluoromethyl)phenyl)thio)aniline (**6d**)<sup>4</sup>

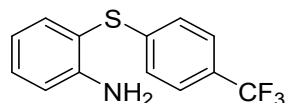

Yellow solid, m.p.: 69-70 °C, 54.1 mg, yield: 67% (Table 5).

$^1\text{H}$  NMR (400 MHz,  $\text{CDCl}_3$ ):  $\delta$  7.47-7.44 (m, 3H), 7.32-7.28 (m, 1H), 7.12 (d,  $J = 8.0$  Hz, 2H), 6.84-6.78 (m, 2H), 4.28 (s, 2H).

$^{13}\text{C}$  NMR (101 MHz,  $\text{CDCl}_3$ ):  $\delta$  149.18, 142.41, 137.87, 132.00, 127.41 (m), 125.88 (q,  $J = 3$  Hz), 122.95, 119.10, 115.64, 112.49.

$^{19}\text{F}$  NMR (376 MHz,  $\text{CDCl}_3$ ):  $\delta$  -62.34.

3-((3-Methoxyphenyl)thio)aniline (**6e**)<sup>5</sup>

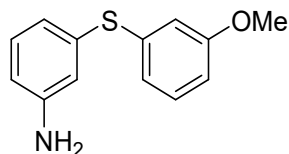

Red oil, 50.7 mg, yield: 73% (Table 5).

$^1\text{H}$  NMR (400 MHz,  $\text{CDCl}_3$ ):  $\delta$  7.21 (t,  $J = 8.0$  Hz, 1H), 7.10 (t,  $J = 7.8$  Hz, 1H), 6.94 (d,  $J = 7.8$  Hz, 1H), 6.91 (s, 1H), 6.80-6.76 (m, 2H), 6.68 (s, 1H), 6.57 (dd,  $J = 8.0,$

1.8 Hz, 1H), 3.77 (s, 3H), 3.56 (s, 2H).

<sup>13</sup>C NMR (101 MHz, CDCl<sub>3</sub>): δ 160.07, 147.18, 137.25, 136.13, 130.06, 129.98, 123.21, 121.49, 117.57, 116.11, 114.22, 112.87, 55.38.

#### 4-(Phenylthio)aniline (**6f**)<sup>6</sup>

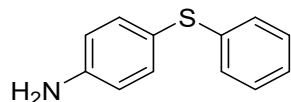

White solid, m.p.:95-97 °C, 45.9 mg, yield: 76% (Table 5).

<sup>1</sup>H NMR (400 MHz, CDCl<sub>3</sub>): δ 7.32 (d, *J* = 8.4 Hz, 2H), 7.22 (t, *J* = 7.6 Hz, 2H), 7.14-7.09 (m, 3H), 6.70 (d, *J* = 8.4 Hz, 2H), 3.97 (s, 2H).

<sup>13</sup>C NMR (101 MHz, CDCl<sub>3</sub>): δ 146.68, 139.67, 136.12, 128.95, 127.54, 125.44, 121.08, 116.19.

#### 2-(Phenylthio)phenol (**7a**)<sup>7</sup>

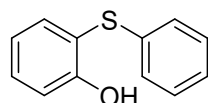

Colorless oil, 60.1 mg, yield: 99% (Table 5).

<sup>1</sup>H NMR (400 MHz, CDCl<sub>3</sub>): δ 7.43 (dd, *J* = 7.7, 1.6 Hz, 1H), 7.27 (td, *J* = 7.8, 1.7 Hz, 1H), 7.12 (t, *J* = 7.5 Hz, 2H), 7.04 (t, *J* = 7.3 Hz, 1H), 6.98 (d, *J* = 7.3 Hz, 3H), 6.85 (t, *J* = 7.5 Hz, 1H), 6.43 (s, 1H).

<sup>13</sup>C NMR (101 MHz, CDCl<sub>3</sub>): δ 157.37, 137.03, 135.96, 132.39, 129.31, 126.95, 126.23, 121.39, 116.39, 115.67.

#### 2-(p-tolylthio)phenol (**7b**)<sup>8</sup>

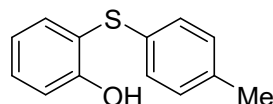

Colorless oil, 53.9 mg, yield: 83% (Table 5).

<sup>1</sup>H NMR (400 MHz, CDCl<sub>3</sub>): δ 7.55 (d, *J* = 7.7 Hz, 1H), 7.37 (t, *J* = 8.2 Hz, 1H), 7.09-7.04 (m, 5H), 6.96 (t, *J* = 7.5 Hz, 1H), 6.58 (s, 1H), 2.31 (s, 3H).

<sup>13</sup>C NMR (101 MHz, CDCl<sub>3</sub>): δ 157.18, 136.75, 136.38, 132.24, 132.11, 130.10,

127.58, 121.29, 117.30, 115.58, 21.04.

2-((2-Methoxyphenyl)thio)phenol (**7c**)<sup>9</sup>

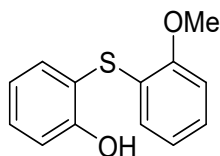

Colorless oil, 52.3 mg, yield: 75% (Table 5).

<sup>1</sup>H NMR (400 MHz, CDCl<sub>3</sub>): δ 7.57 (d, *J* = 7.7 Hz, 1H), 7.36 (t, *J* = 7.7 Hz, 1H), 7.20 (t, *J* = 7.3 Hz, 1H), 7.05 (d, *J* = 8.2 Hz, 1H), 6.95-6.82 (m, 5H), 3.94 (s, 3H).

<sup>13</sup>C NMR (101 MHz, CDCl<sub>3</sub>): δ 157.78, 156.68, 137.14, 132.10, 129.69, 128.21, 123.90, 121.66, 121.18, 116.73, 115.58, 110.83, 56.01.

2-((4-Chlorophenyl)thio)phenol (**7d**)<sup>8</sup>

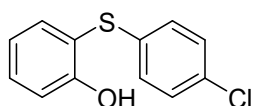

Colorless oil, 60.4 mg, yield: 85% (Table 5).

<sup>1</sup>H NMR (400 MHz, CDCl<sub>3</sub>): δ 7.52 (dd, *J* = 7.7, 1.6 Hz, 1H), 7.40 (td, *J* = 7.8, 1.7 Hz, 1H), 7.21 (d, *J* = 8.6 Hz, 2H), 7.09 (d, *J* = 8.2 Hz, 1H), 7.01 (d, *J* = 8.4 Hz, 2H), 6.98 (t, *J* = 7.6 Hz, 1H), 6.48 (s, 1H).

<sup>13</sup>C NMR (101 MHz, CDCl<sub>3</sub>): δ 157.28, 136.93, 134.56, 132.66, 132.23, 129.41, 128.21, 121.56, 116.0, 115.86.

2-((3-Fluorophenyl)thio)phenol (**7e**)

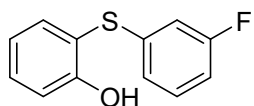

Colorless oil, 50.2 mg, yield: 76% (Table 5).

<sup>1</sup>H NMR (400 MHz, CDCl<sub>3</sub>): δ 7.54 (d, *J* = 7.7 Hz, 1H), 7.42 (t, *J* = 7.8 Hz, 1H), 7.20 (q, *J* = 8.0 Hz, 1H), 7.11 (d, *J* = 8.2 Hz, 1H), 6.99 (t, *J* = 7.5 Hz, 1H), 6.89-6.83 (m, 2H), 6.74 (d, *J* = 9.2 Hz, 1H), 6.46 (s, 1H).

<sup>13</sup>C NMR (101 MHz, CDCl<sub>3</sub>): δ 163.26 (d, *J* = 248.7 Hz), 157.44, 138.53 (d, *J* = 7.6

Hz), 137.17, 132.91, 130.57 (d,  $J = 8.5$  Hz), 121.62, 115.94, 115.31, 122.22 (d,  $J = 3.0$  Hz), 113.61 (d,  $J = 24.3$  Hz), 113.17 (d,  $J = 21.4$  Hz).

$^{19}\text{F}$  NMR (376 MHz,  $\text{CDCl}_3$ ):  $\delta$  -111.45.

HRMS (ESI)  $m/z$ :  $[\text{M}+\text{H}]^+$  Calcd for  $\text{C}_{12}\text{H}_{10}\text{FOS}^+$  219.0279, found 219.0285

### 3-(Phenylthio)phenol (**7f**)<sup>10</sup>

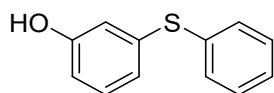

Red oil, 44.9 mg, yield: 74% (Table 5).

$^1\text{H}$  NMR (400 MHz,  $\text{CDCl}_3$ ):  $\delta$  7.38 (d,  $J = 7.1$  Hz, 2H), 7.33-7.24 (m, 3H), 7.14 (t,  $J = 7.9$  Hz, 1H), 6.88 (d,  $J = 7.8$  Hz, 1H), 6.73 (s, 1H), 6.67 (dd,  $J = 8.1, 2.1$  Hz, 1H), 5.15 (s, 1H).

$^{13}\text{C}$  NMR (101 MHz,  $\text{CDCl}_3$ ):  $\delta$  156.07, 137.88, 134.85, 131.98, 130.31, 129.40, 127.61, 122.78, 117.00, 114.08.

### 4-(Phenylthio)phenol (**7g**)<sup>11</sup>

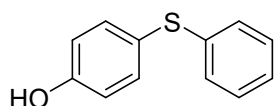

Yellow oil, 49.2 mg, yield: 81% (Table 5).

$^1\text{H}$  NMR (400 MHz,  $\text{CDCl}_3$ ):  $\delta$  7.34 (d,  $J = 8.4$  Hz, 2H), 7.22 (t,  $J = 7.5$  Hz, 2H), 7.18-7.11 (m, 3H), 6.81 (d,  $J = 8.4$  Hz, 2H), 5.69 (s, 1H).

$^{13}\text{C}$  NMR (101 MHz,  $\text{CDCl}_3$ ):  $\delta$  155.91, 138.41, 135.59, 129.08, 128.44, 126.00, 124.65, 116.63.

## References

1. B. Song, N. Cao, J. Zhang and J. Xie, *Mol. Catal.*, 2021, **516**.
2. R. S. Schwab, D. Singh, E. E. Alberto, P. Piquini, O. E. D. Rodrigues and A. L. Braga, *Catal. Sci. Technol.*, 2011, **1**.
3. F. Kwong, K. Yung and H. Lee, *Synlett*, 2014, **25**, 2743-2747.
4. A. Kumar and S. Kumar, *Tetrahedron*, 2014, **70**, 1763-1772.
5. J. Xu, R. Y. Liu, C. S. Yeung and S. L. Buchwald, *ACS Catal.*, 2019, **9**, 6461-6466.

6. X. Ren, S. Tang, L. Li, J. Li, H. Liang, G. Li, G. Yang, H. Li and B. Yuan, *J. Org. Chem.*, 2019, **84**, 8683-8690.
7. D. Wang, X. Yu, L. Wang, W. Yao, Z. Xu and H. Wan, *Tetrahedron Lett.*, 2016, **57**, 5211-5214.
8. Y. Chen, F. Xiao, H. Chen, S. Liu and G.-J. Deng, *RSC Adv.*, 2014, **4**, 44621-44628.
9. Z. He and T. F. Jamison, *Angew. Chem. Int. Ed.*, 2014, **53**, 3353-3357.
10. M. A. Fernandez-Rodriguez and J. F. Hartwig, *J. Org. Chem.*, 2009, **74**, 1663-1672.
11. J. Oliver-Meseguer, L. Liu, S. Garcia-Garcia, C. Canos-Gimenez, I. Dominguez, R. Gavara, A. Domenech-Carbo, P. Concepcion, A. Leyva-Perez and A. Corma, *J. Am. Chem. Soc.*, 2015, **137**, 3894-3900.

# Copies of $^1\text{H}$ NMR, $^{13}\text{C}$ NMR and $^{19}\text{F}$ NMR spectra

## 2-(Phenylthio)pyridine 1-oxide (3a)

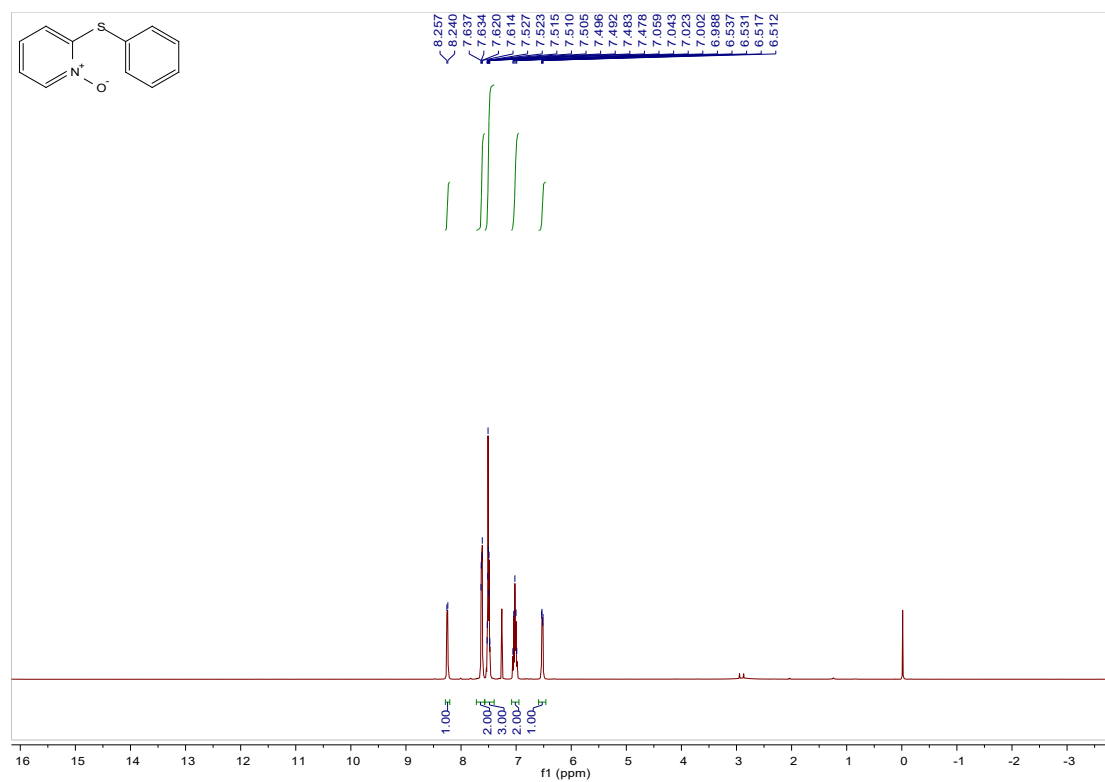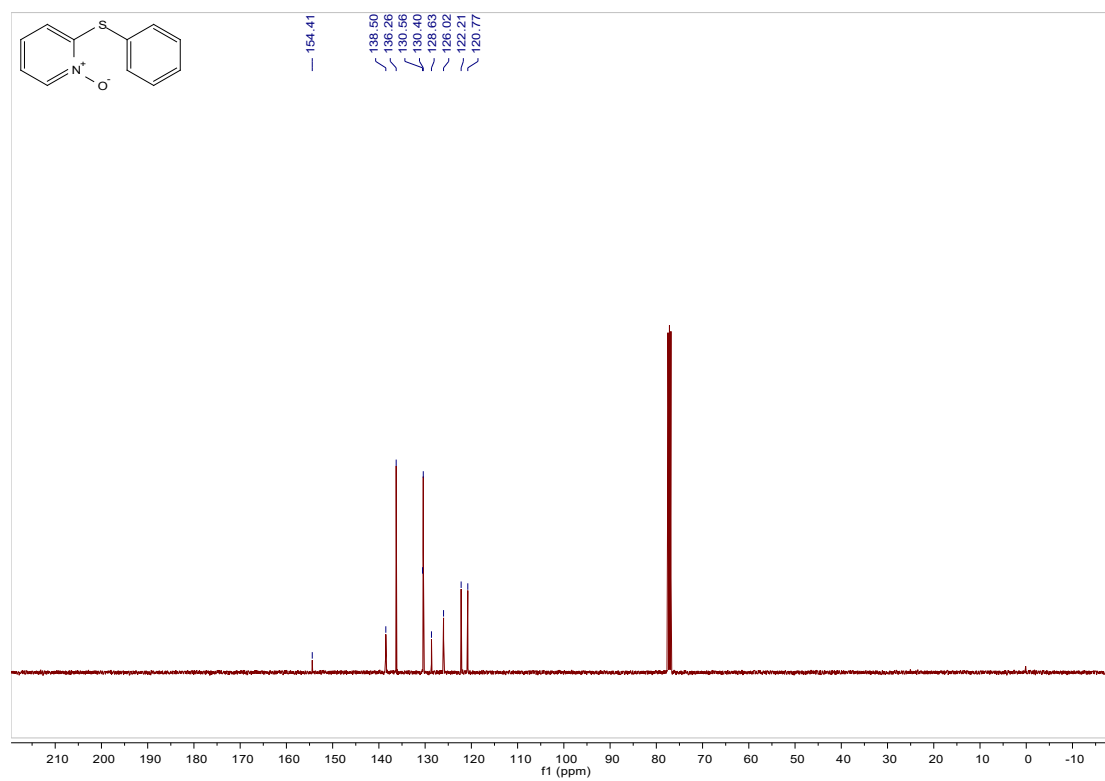

## 2-(O-tolylthio)pyridine 1-oxide (**3b**)

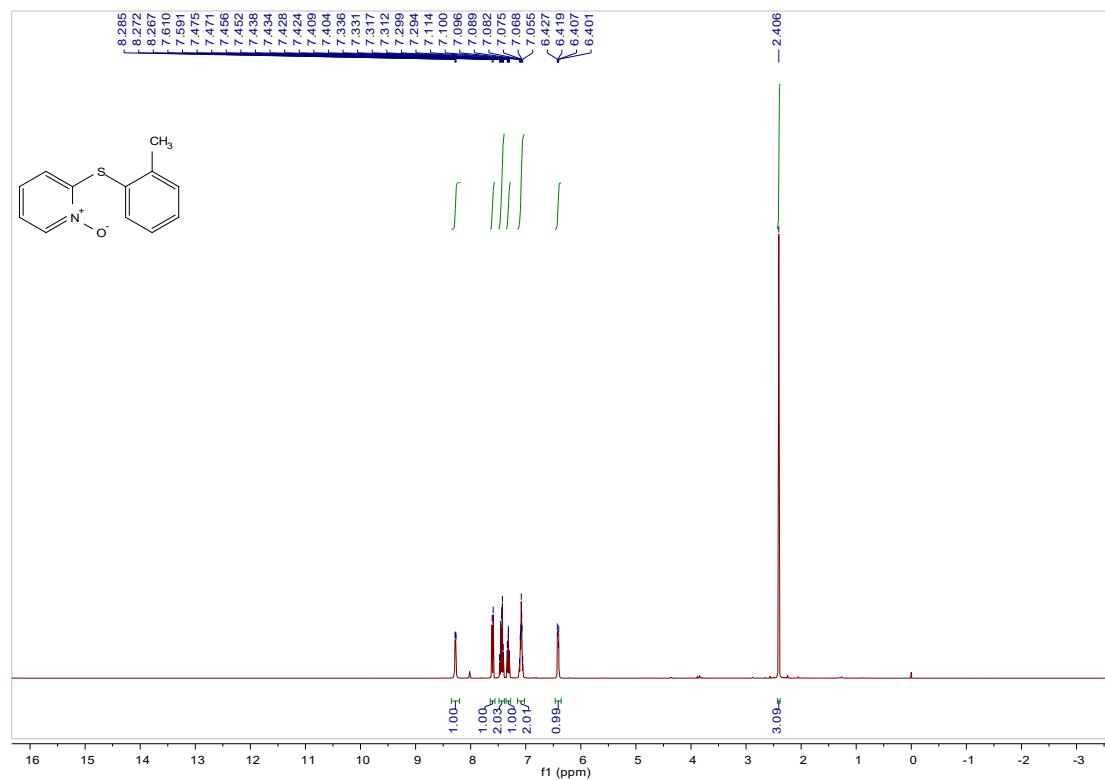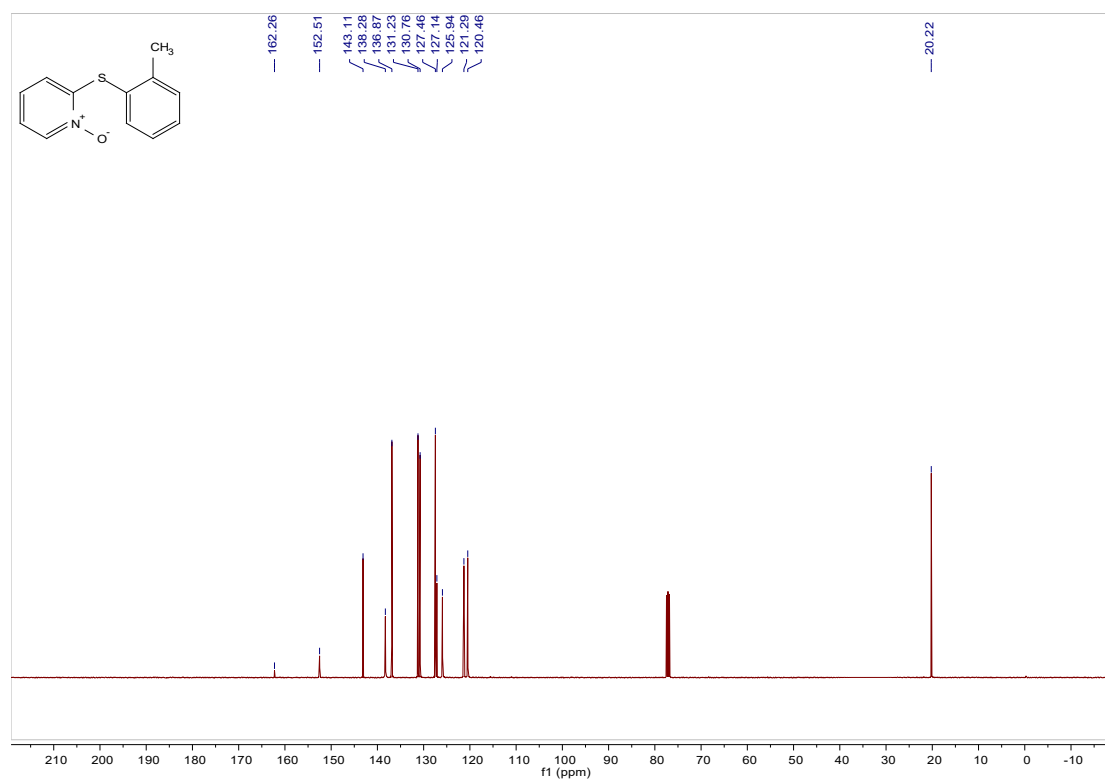

## 2-(M-tolylthio)pyridine 1-oxide (3c)

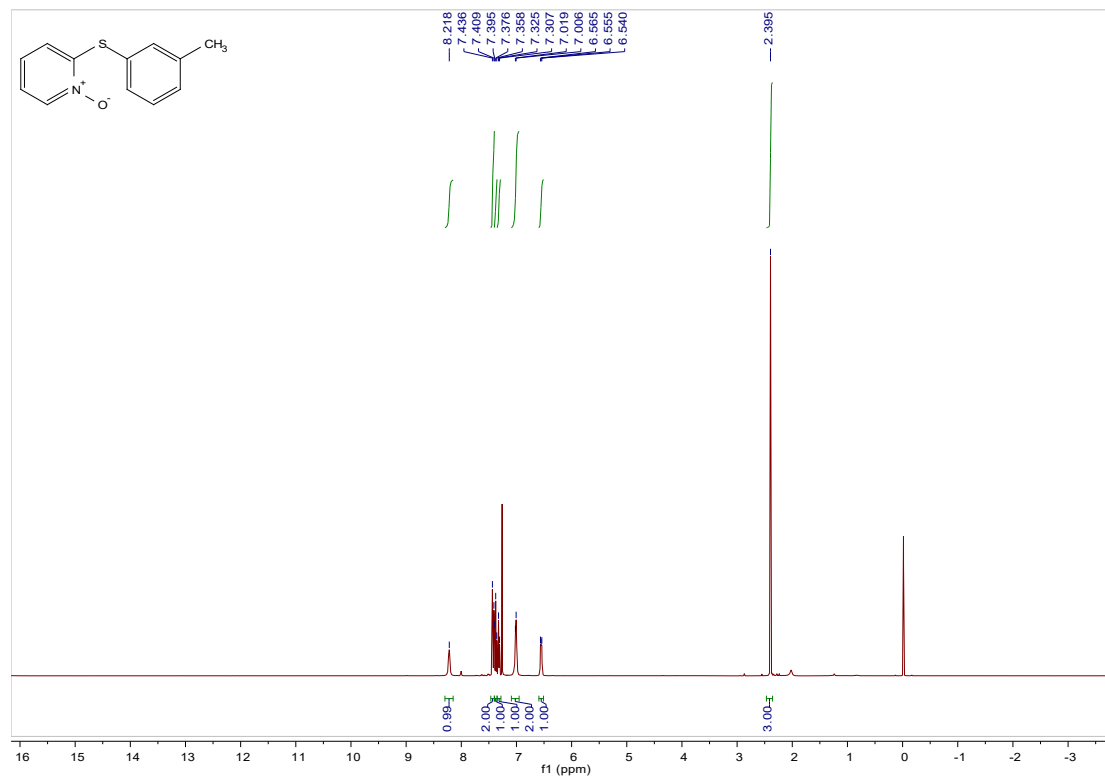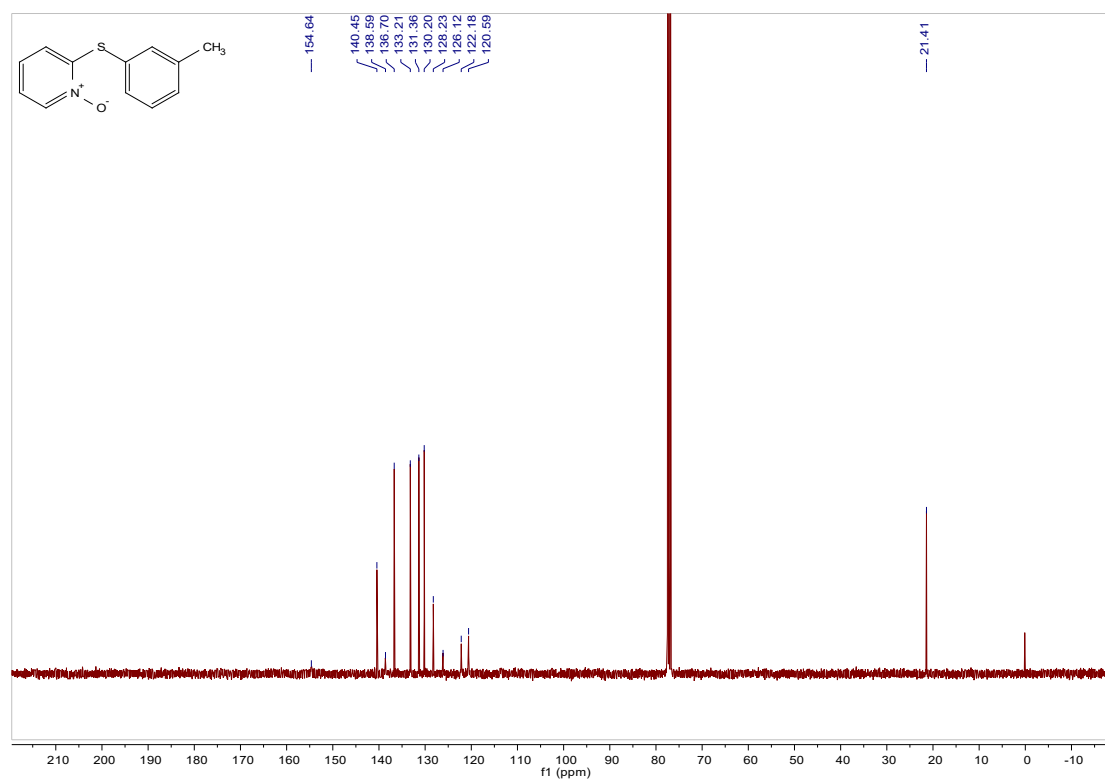



## 2-(p-tolylthio)pyridine 1-oxide (**3d**)

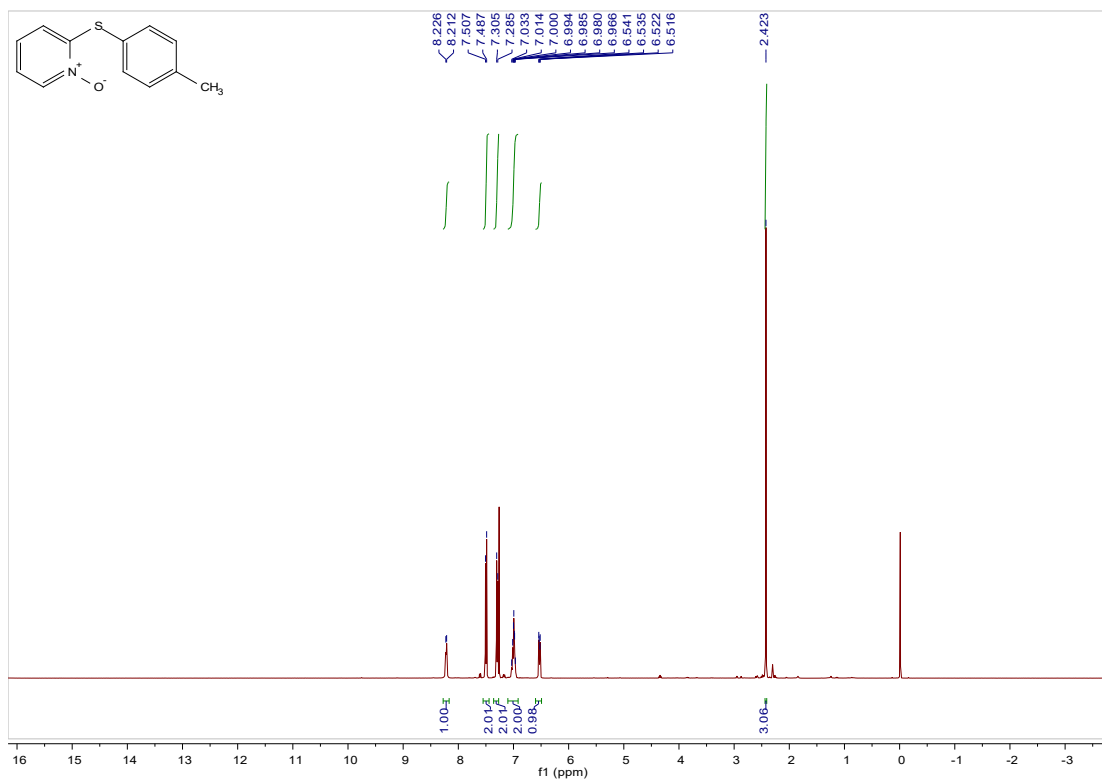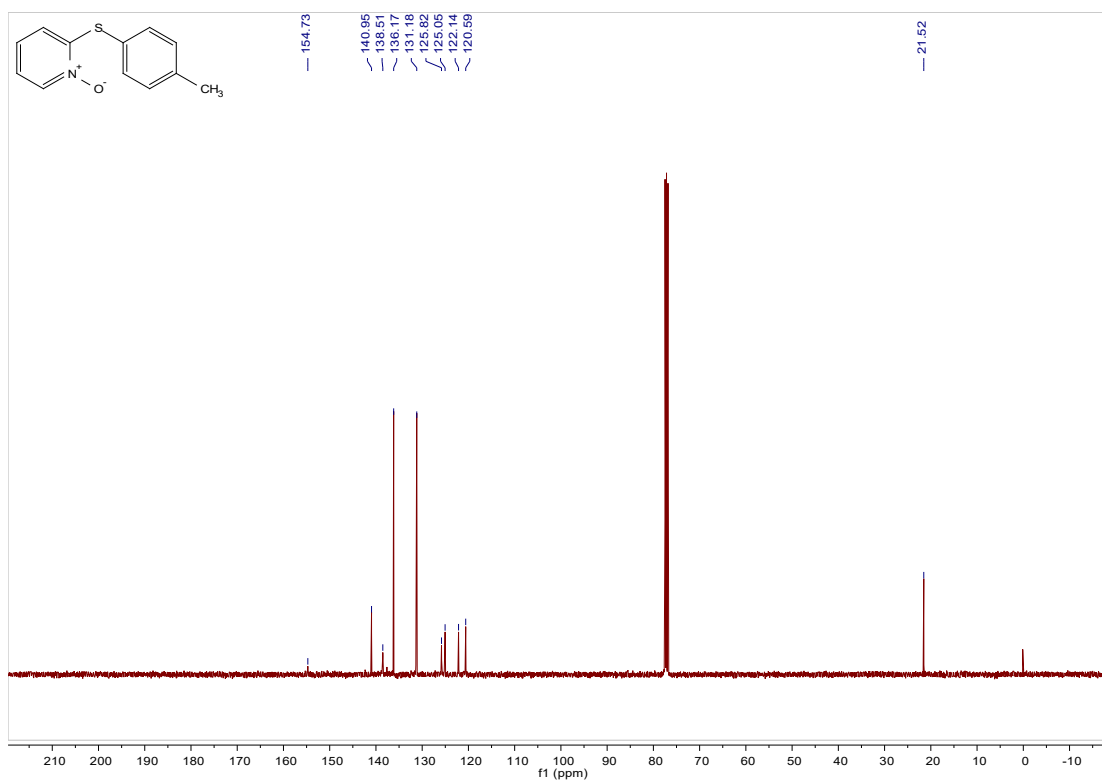

## 2-((2,4-Dimethylphenyl)thio)pyridine 1-oxide (3e)

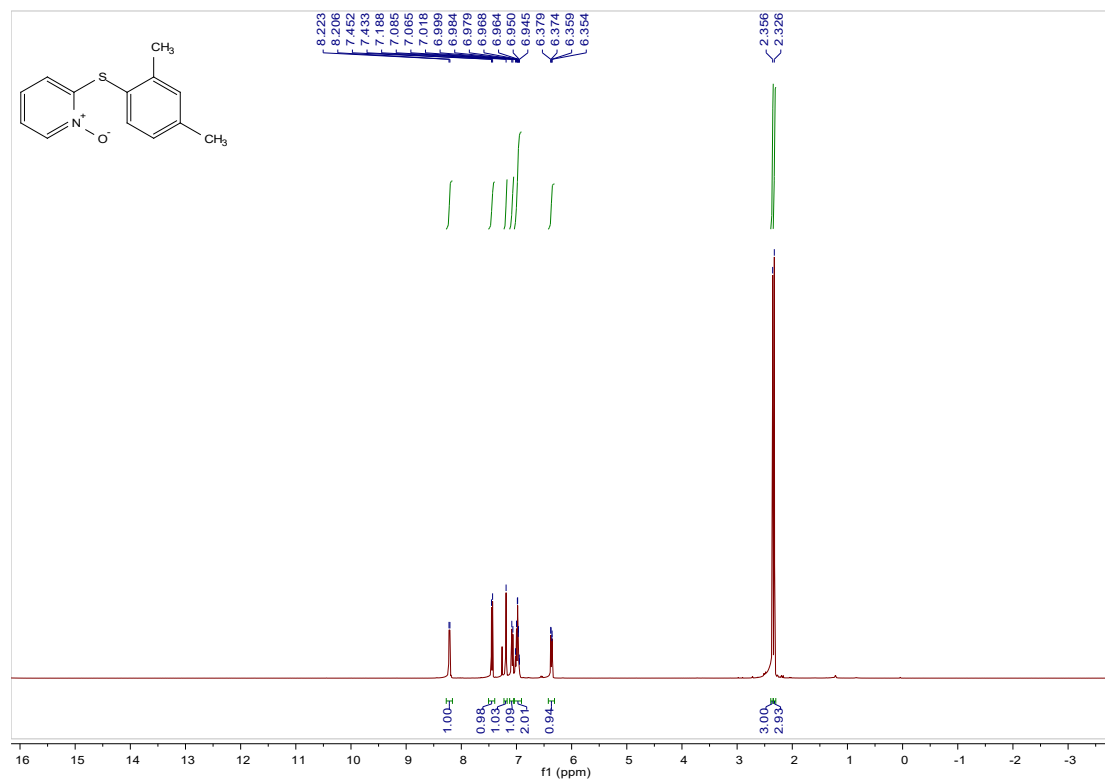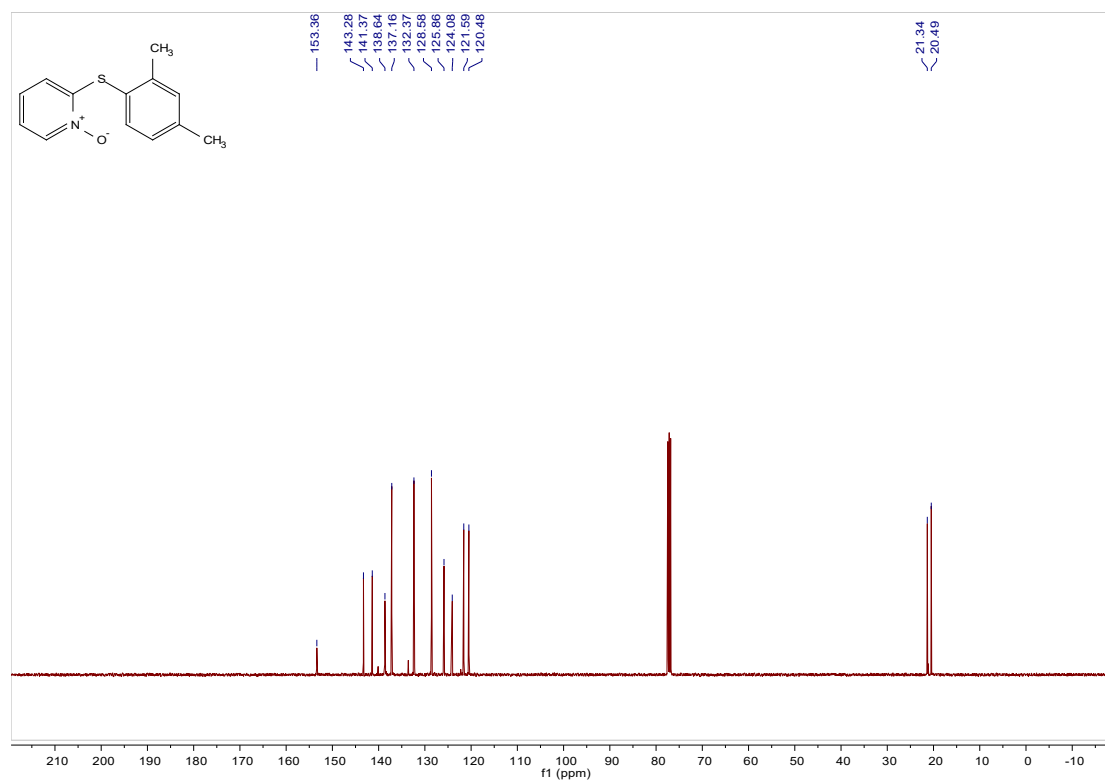

## 2-((2-Methoxyphenyl)thio)pyridine 1-oxide (3f)

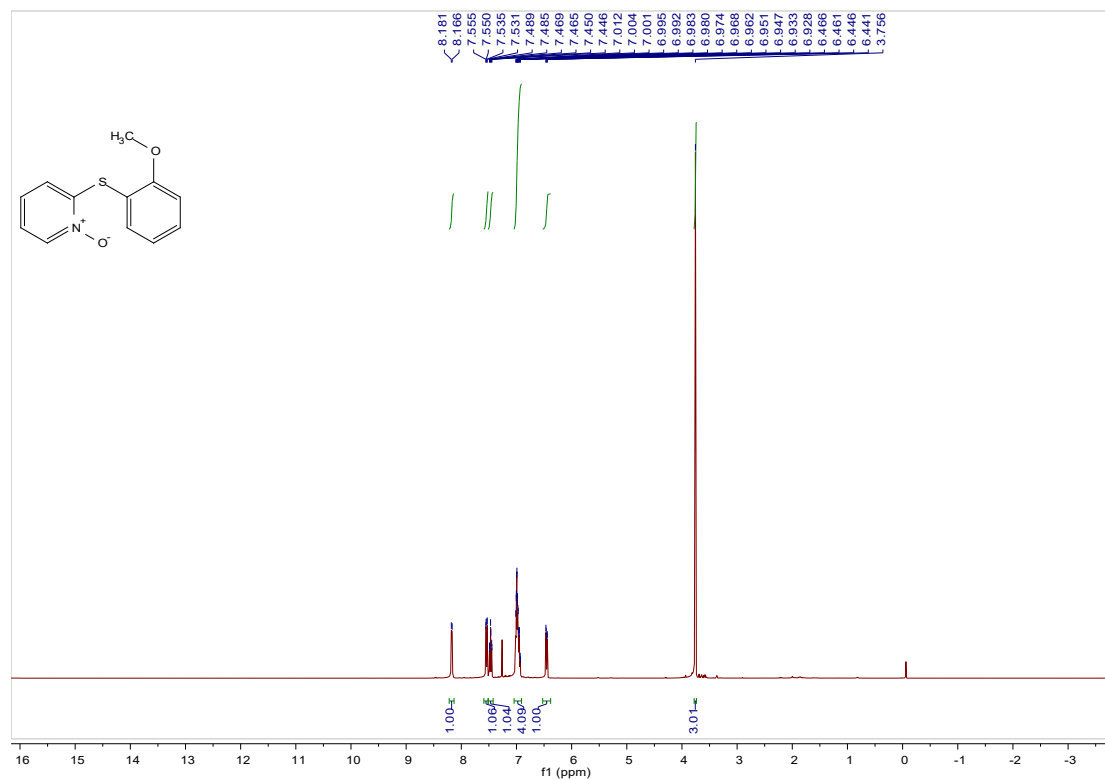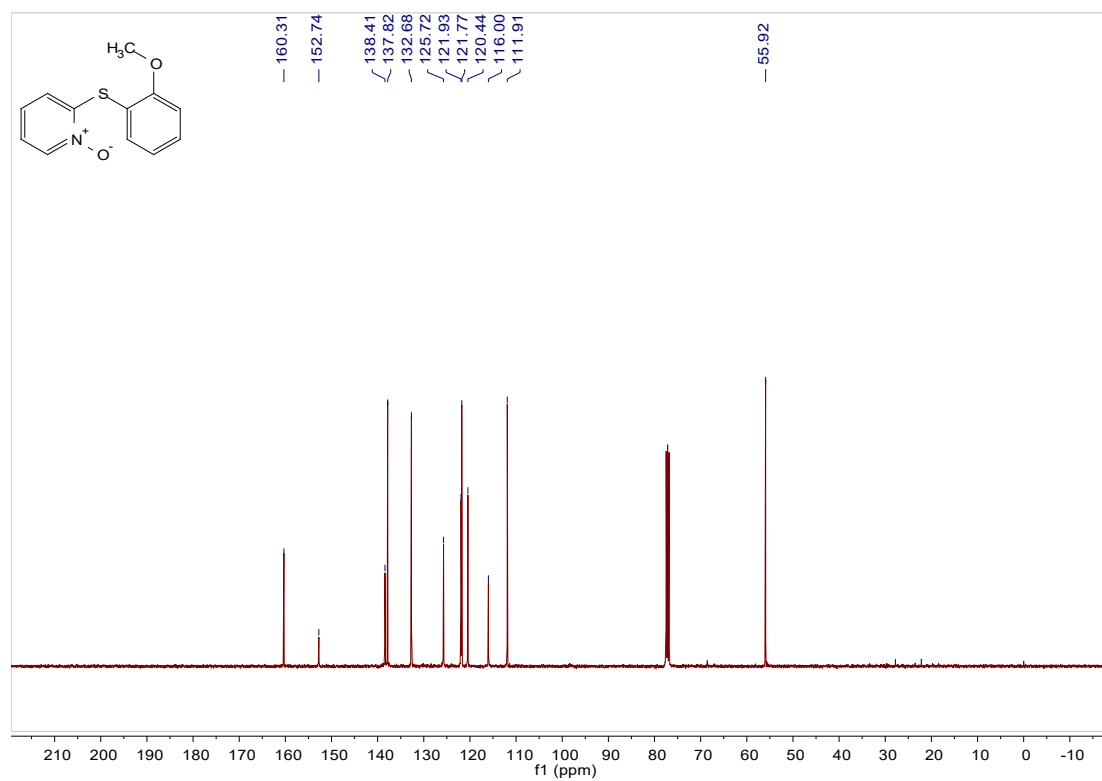

2-((3-Methoxyphenyl)thio)pyridine 1-oxide (**3g**)

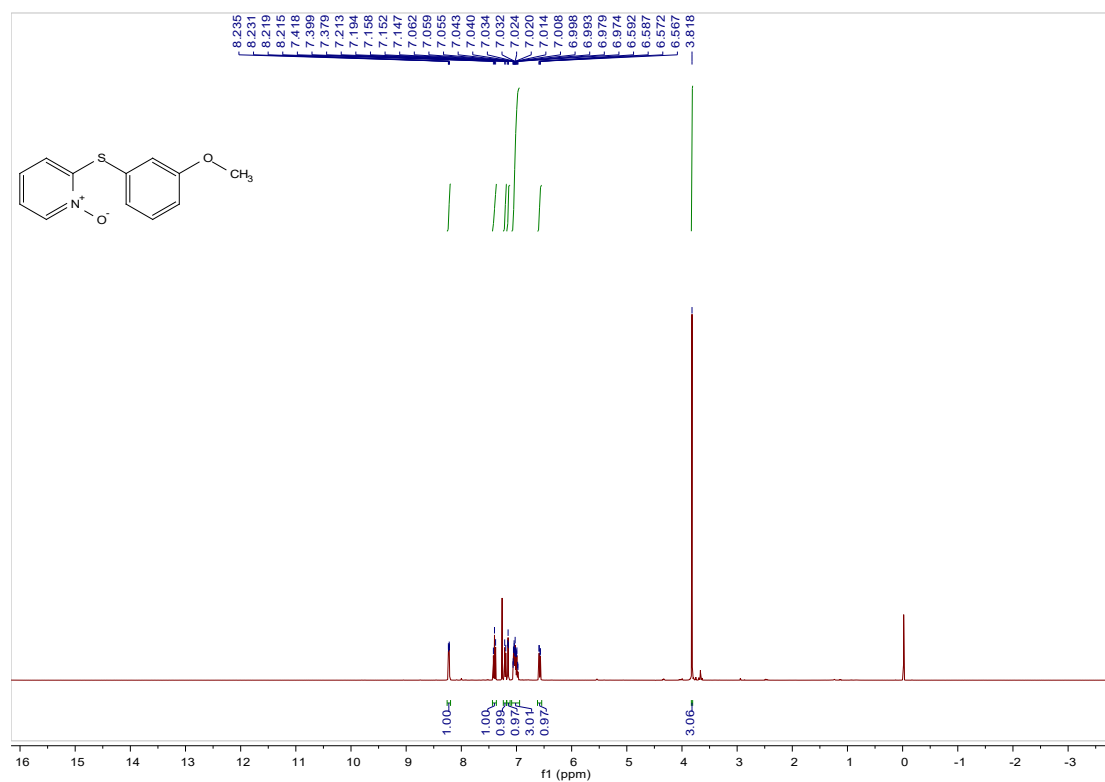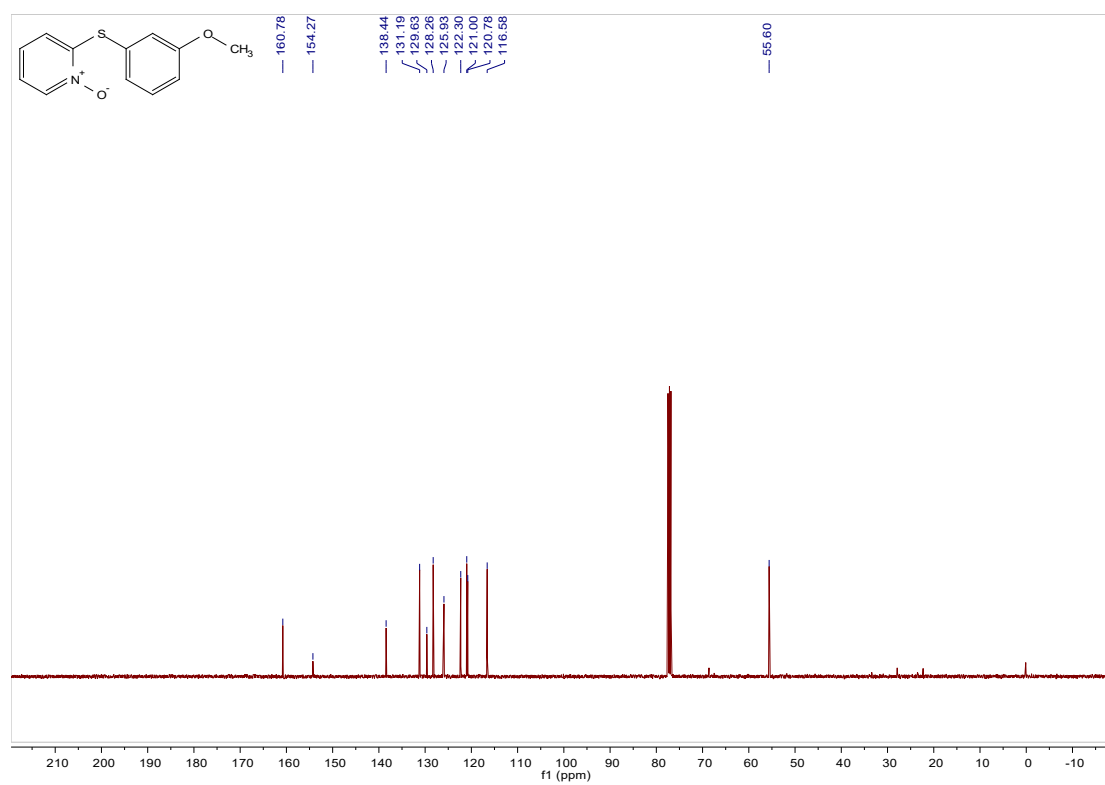

## 2-((4-Methoxyphenyl)thio)pyridine 1-oxide (**3h**)

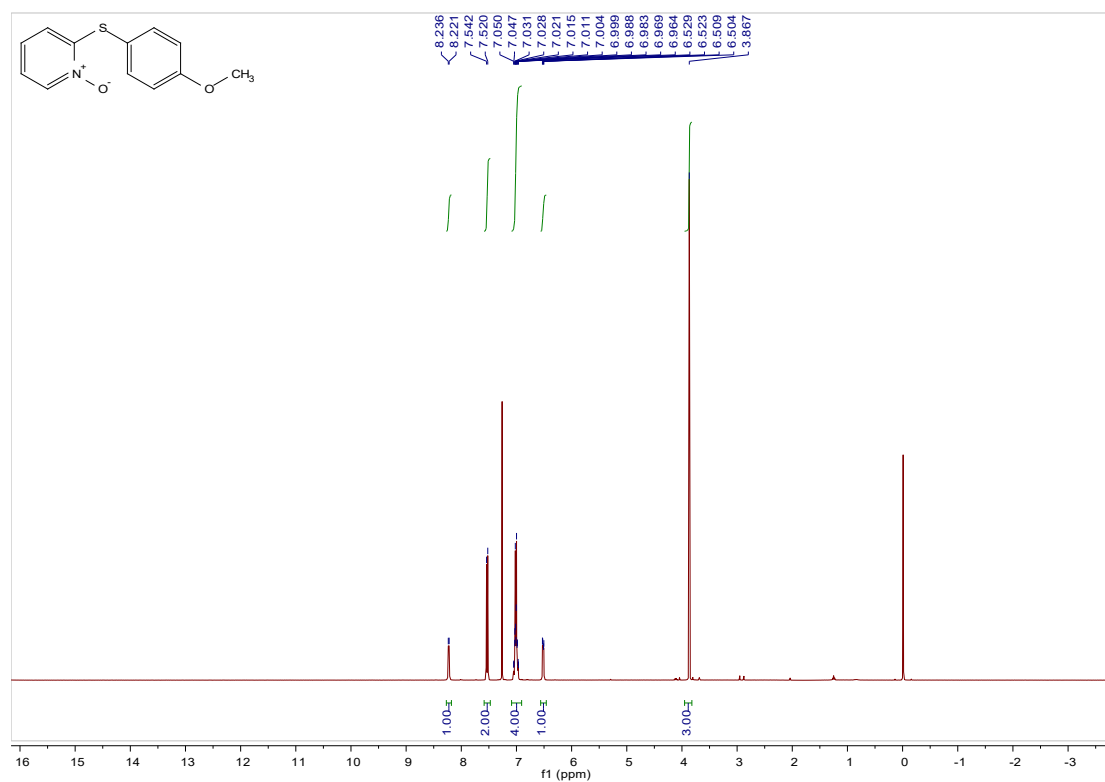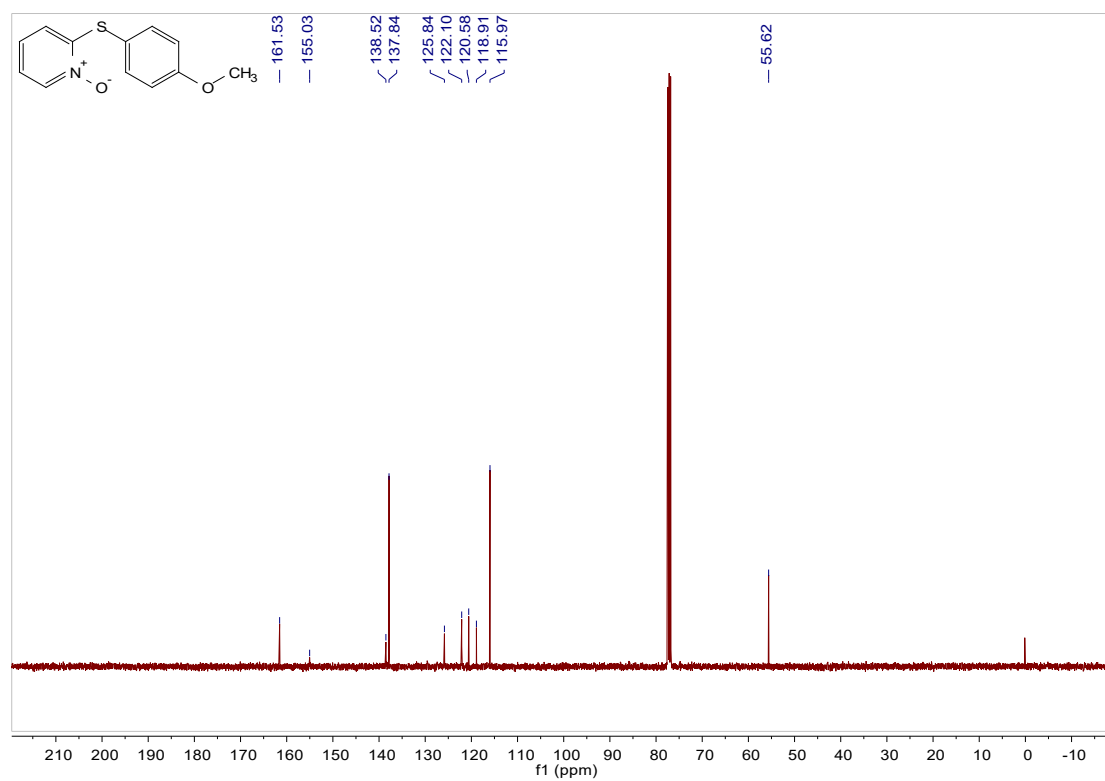

## 2-((4-(Tert-butyl)phenyl)thio)pyridine 1-oxide (**3i**)

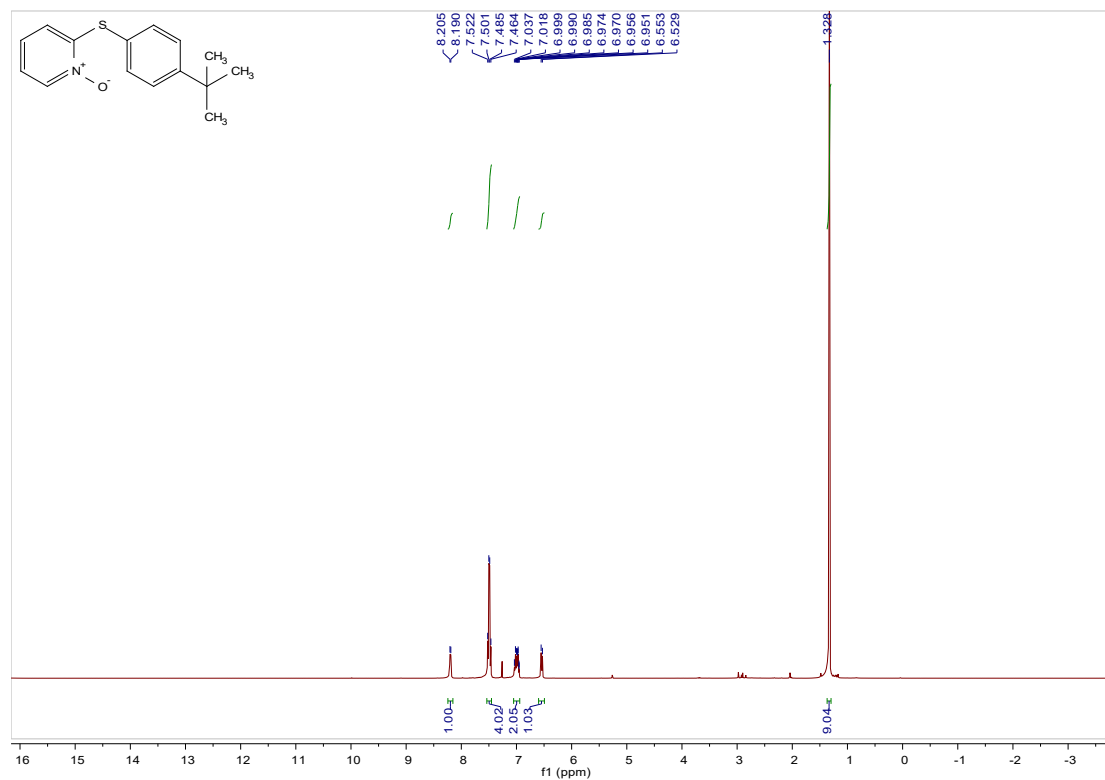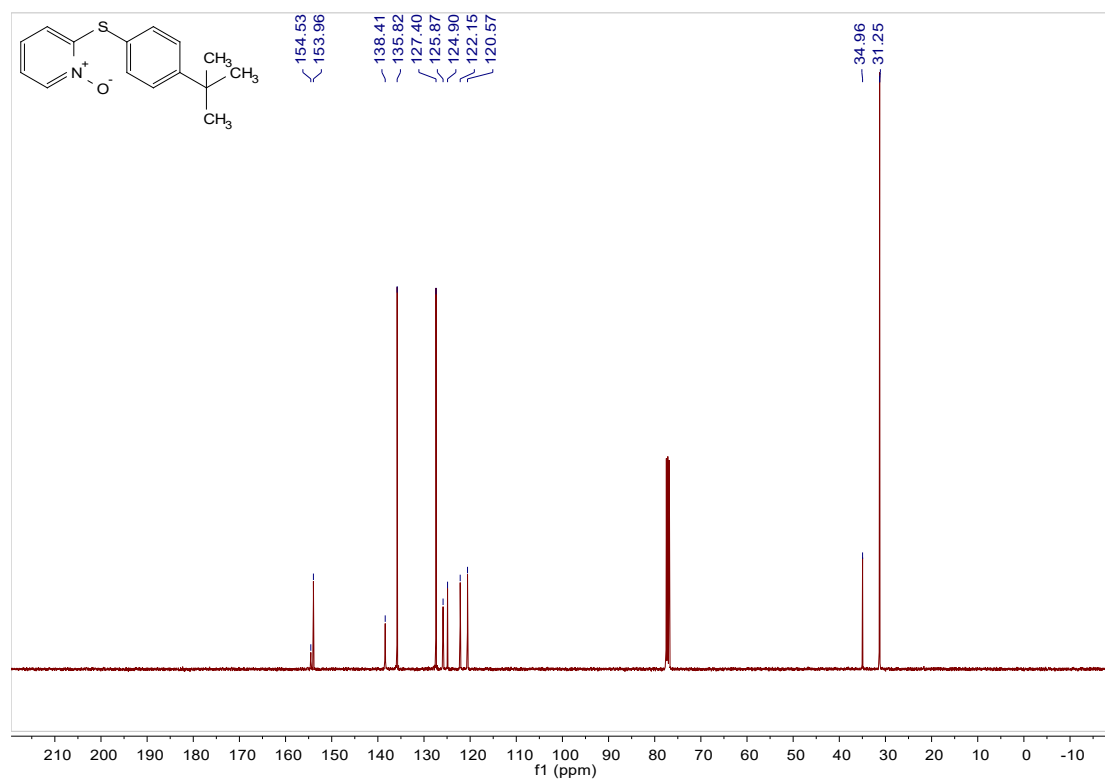

## 2-((3-Fluorophenyl)thio)pyridine 1-oxide (3j)

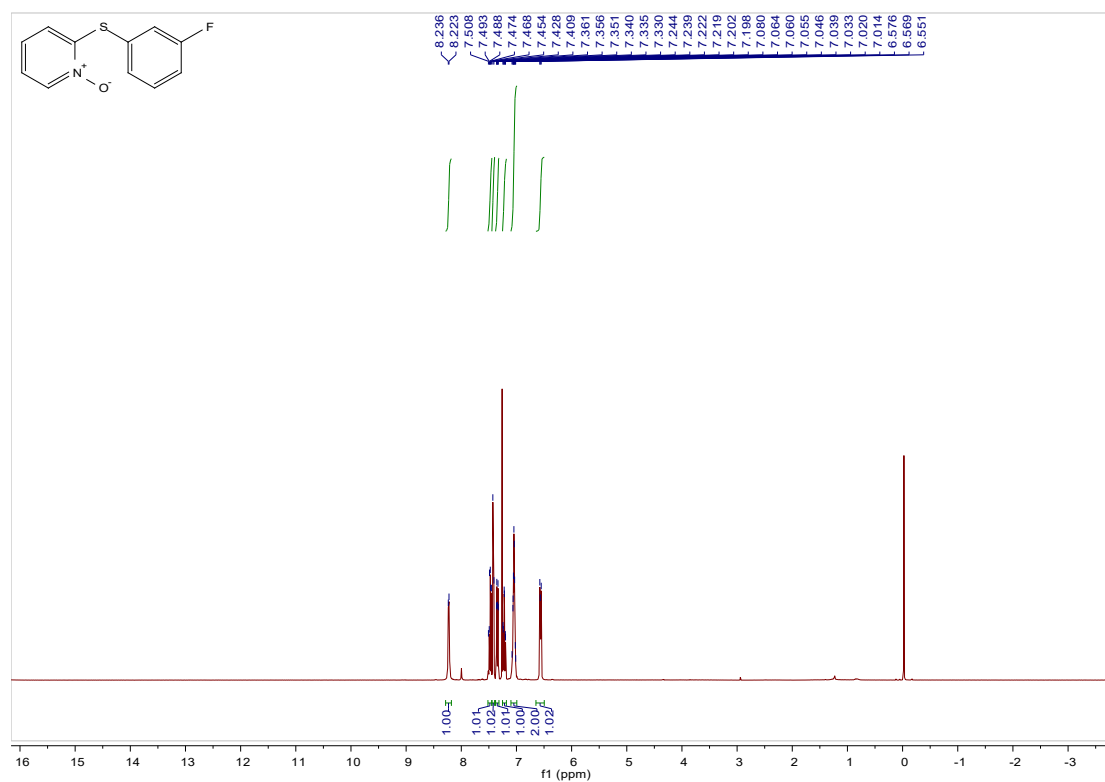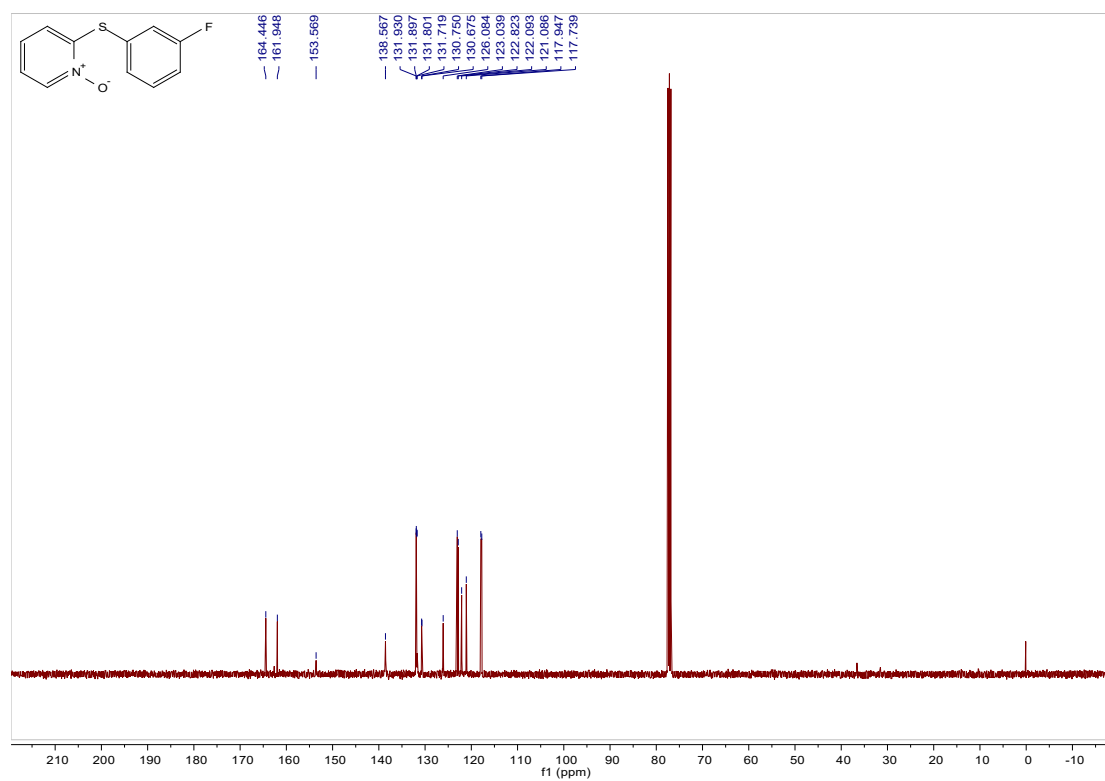

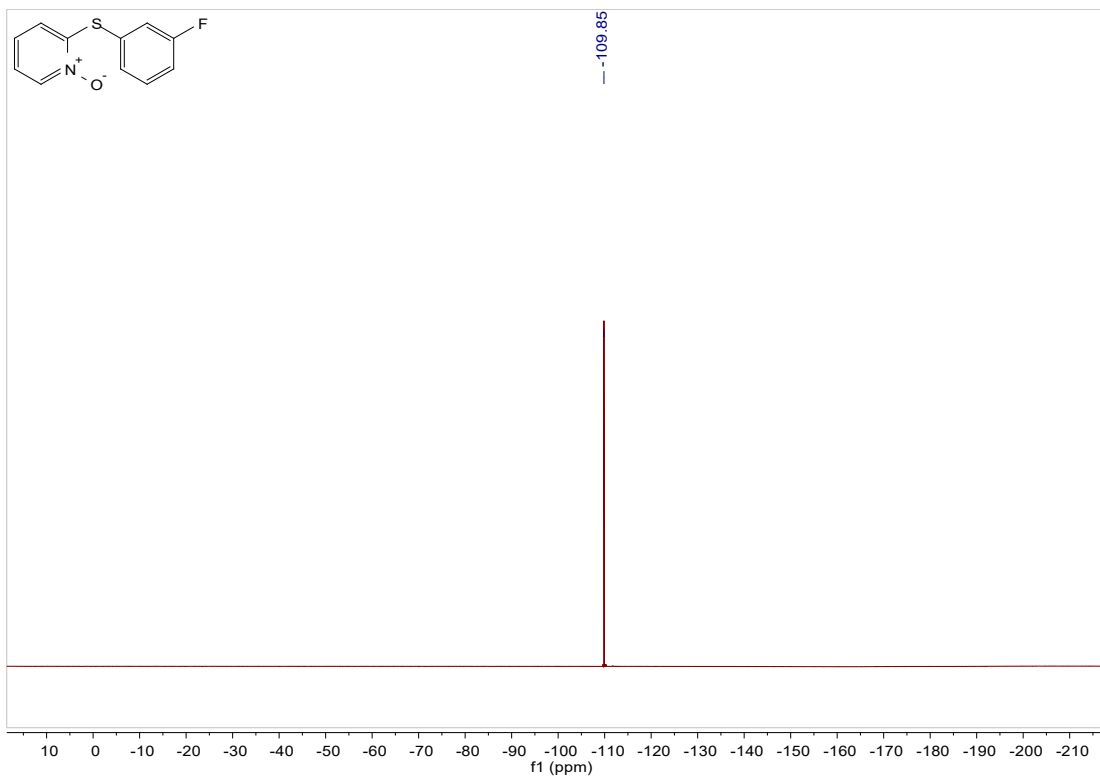



## 2-((4-Fluorophenyl)thio)pyridine 1-oxide (3k)

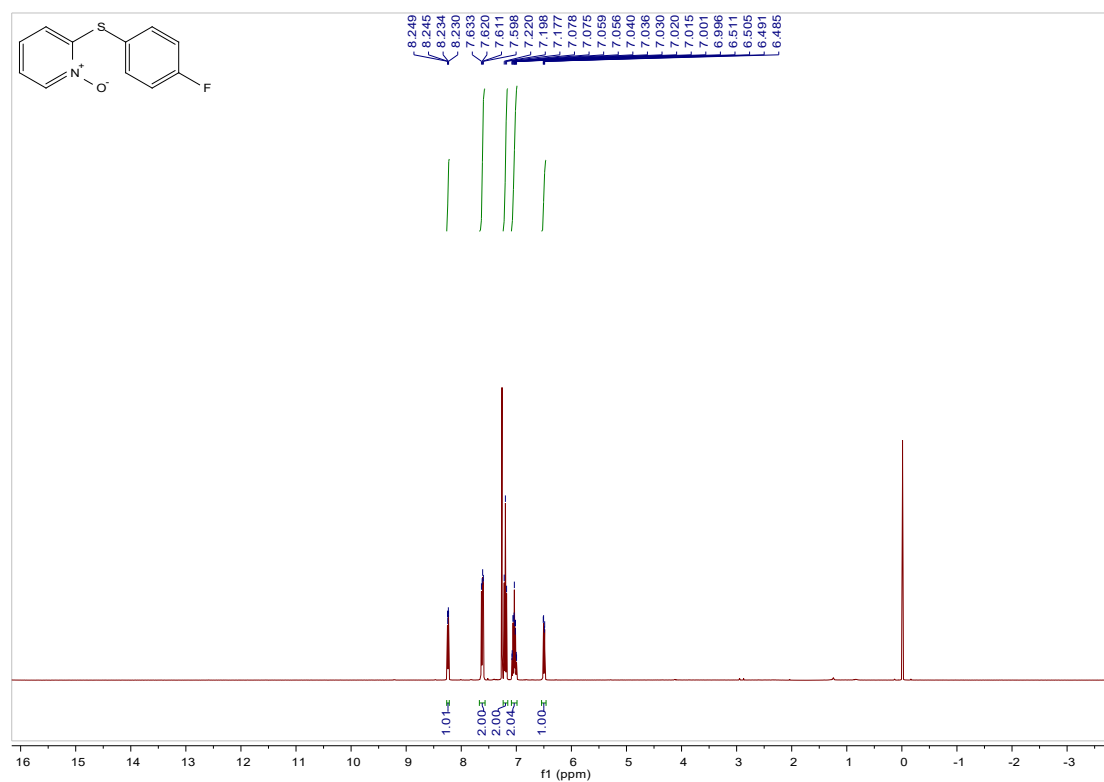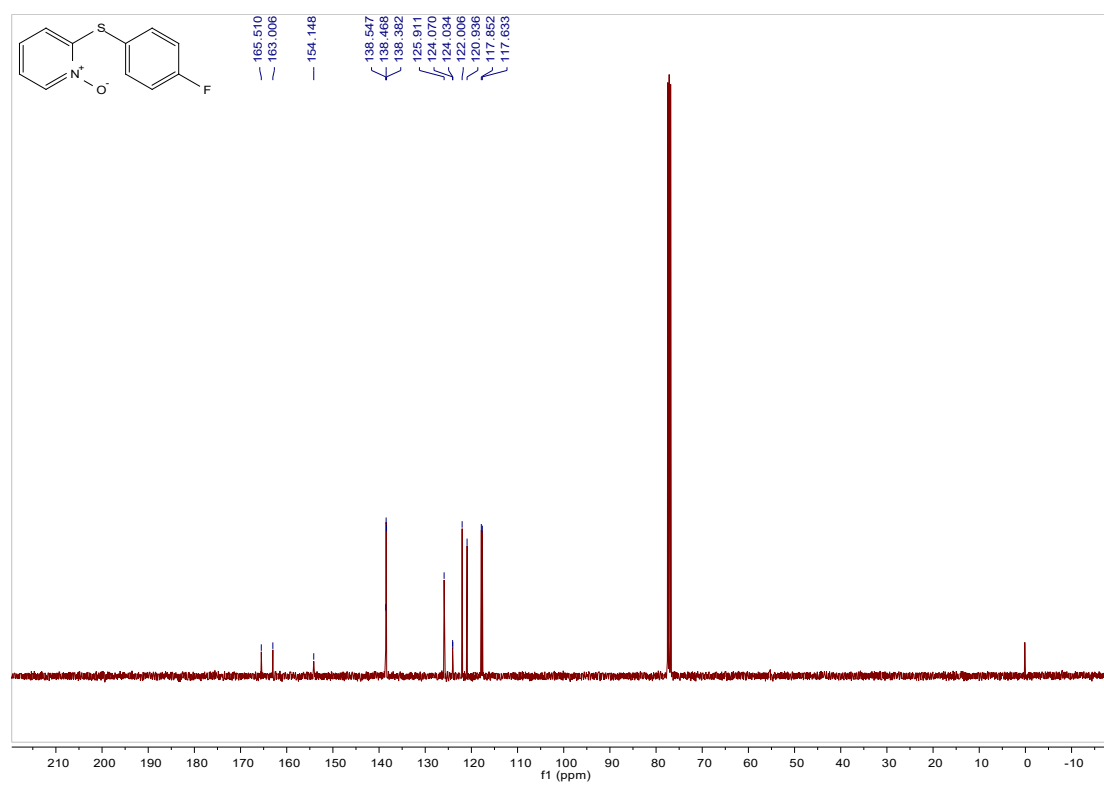

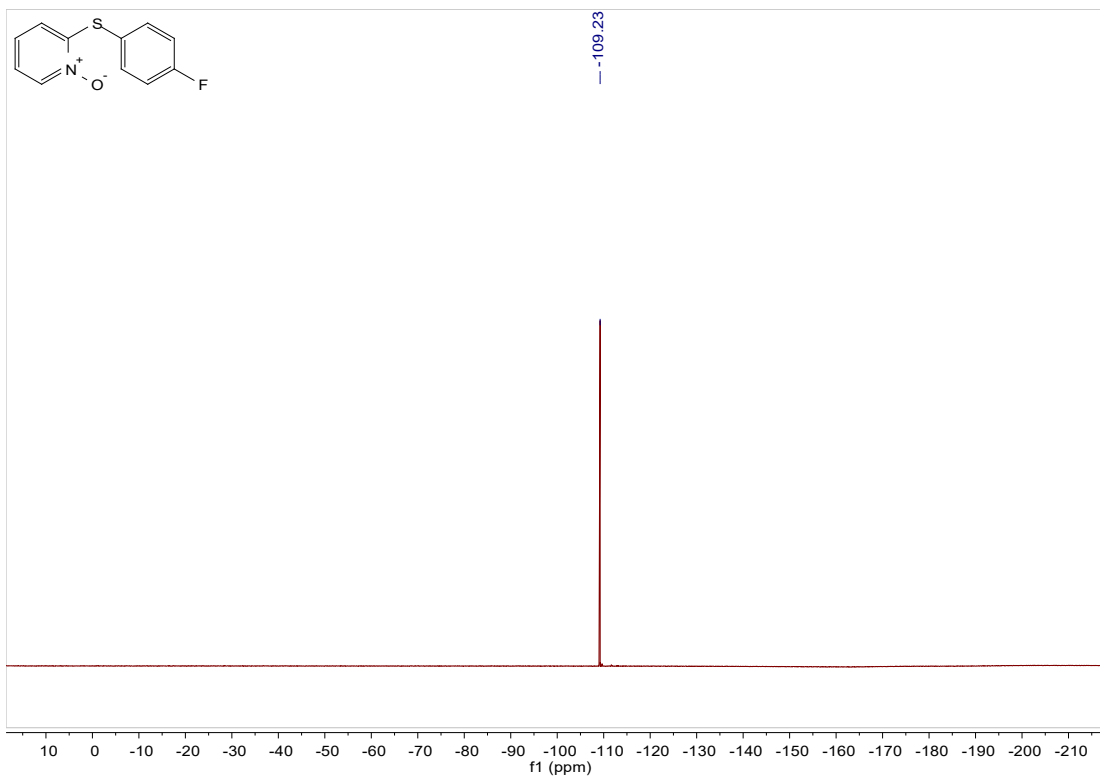

## 2-((4-Chlorophenyl)thio)pyridine 1-oxide (31)

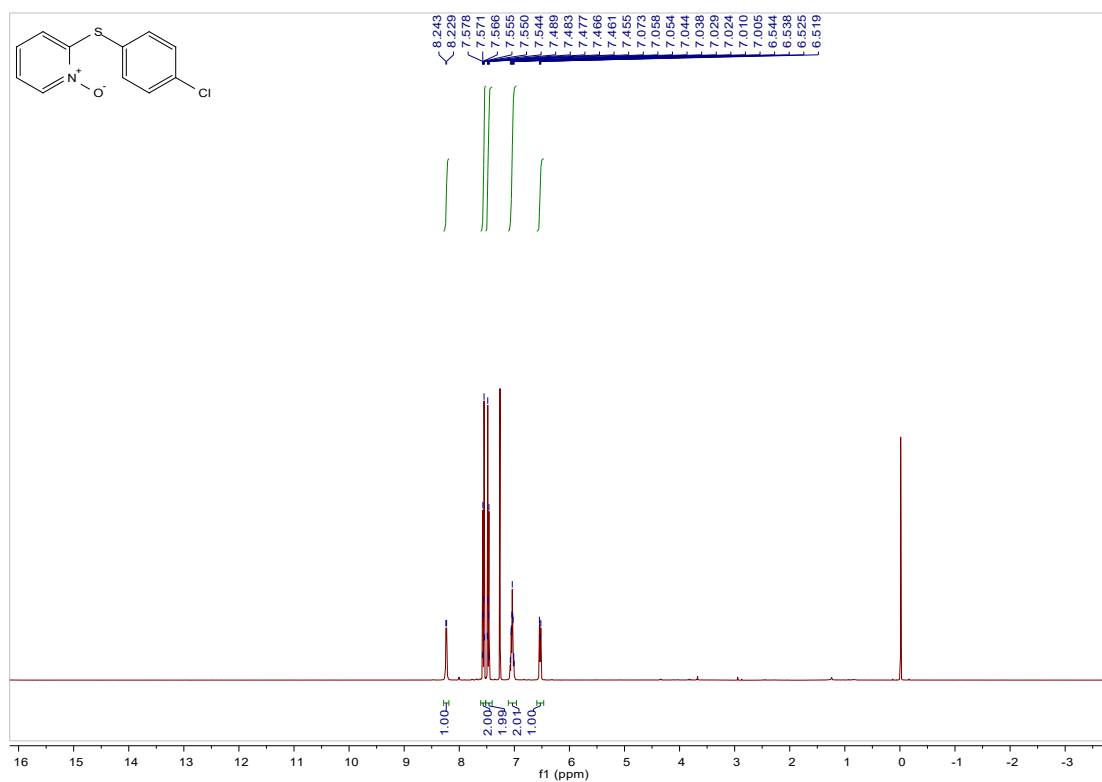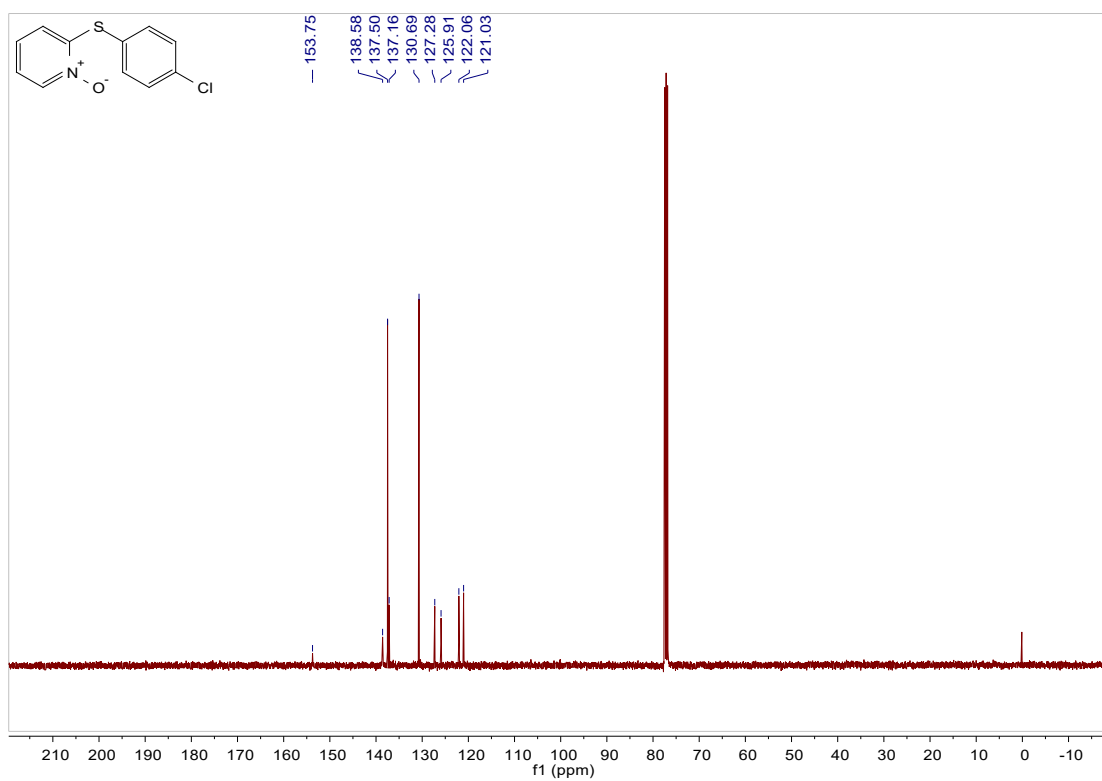

## 2-([1,1'-Biphenyl]-4-ylthio)pyridine 1-oxide (**3m**)

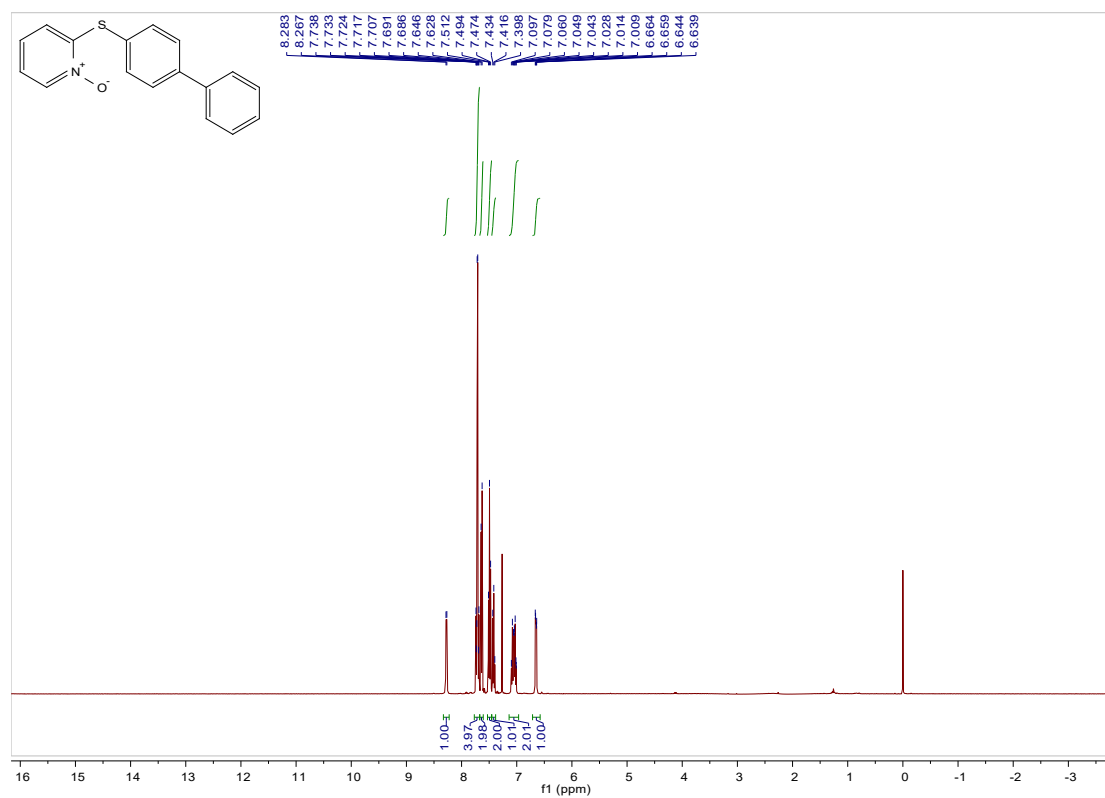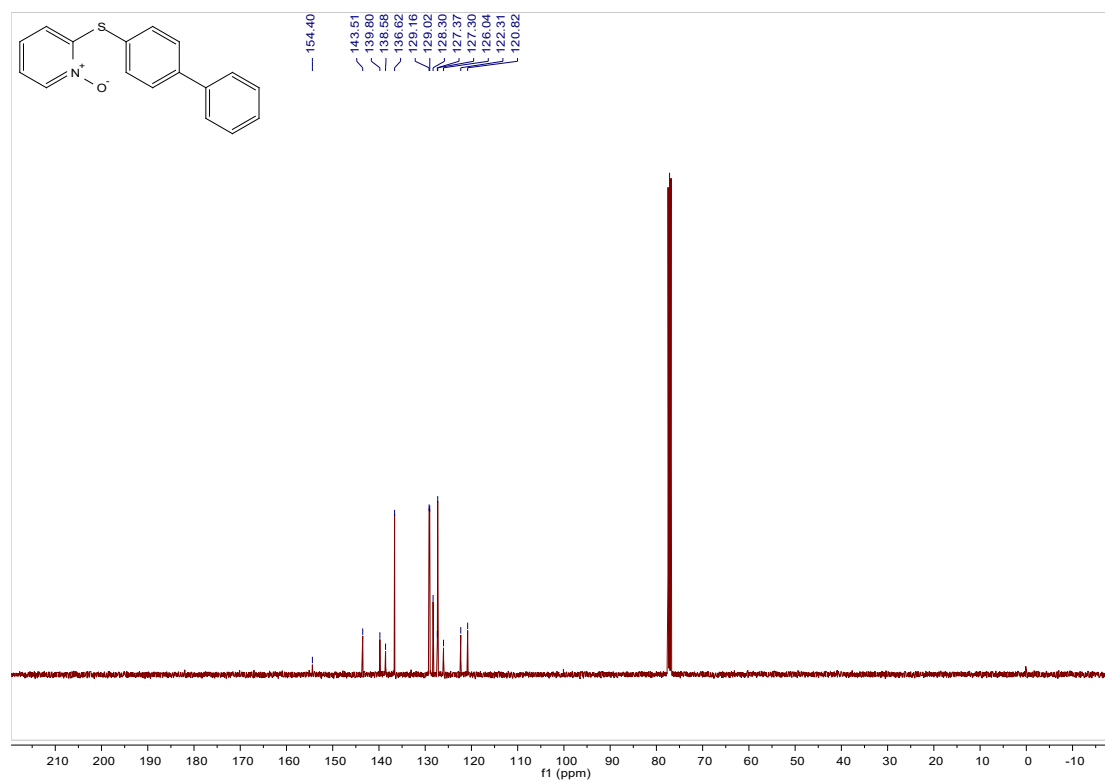

## 2-((4-(Trifluoromethyl)phenyl)thio)pyridine 1-oxide (**3n**)

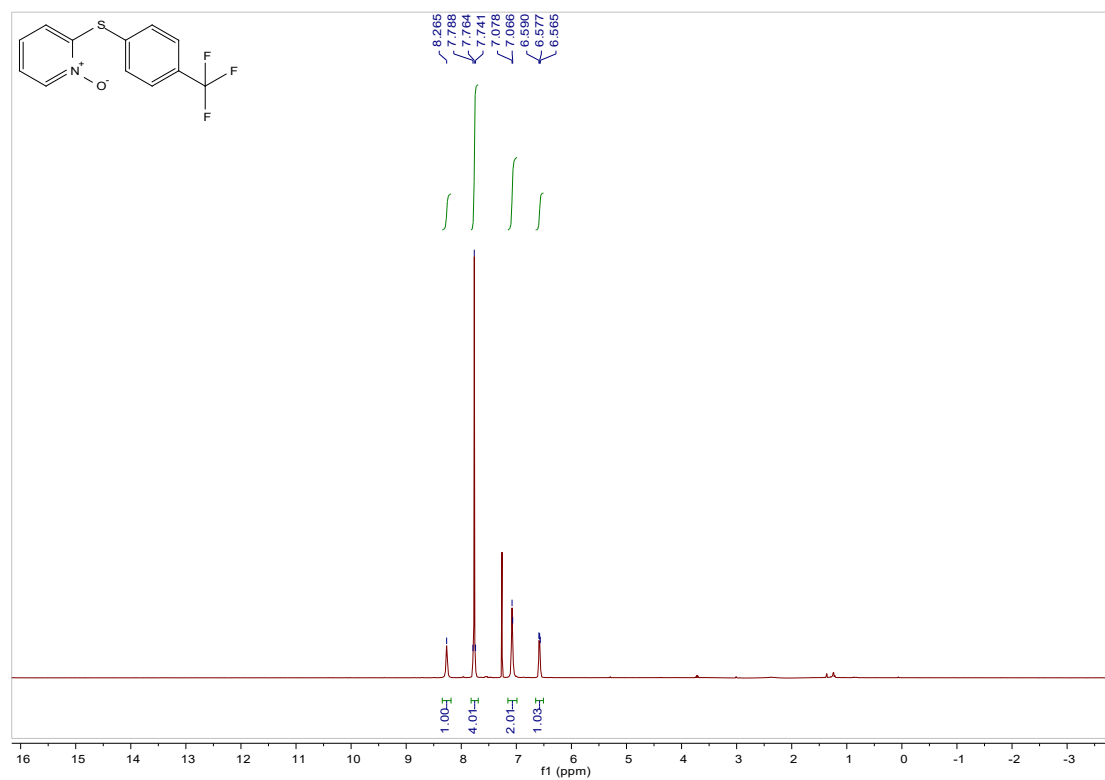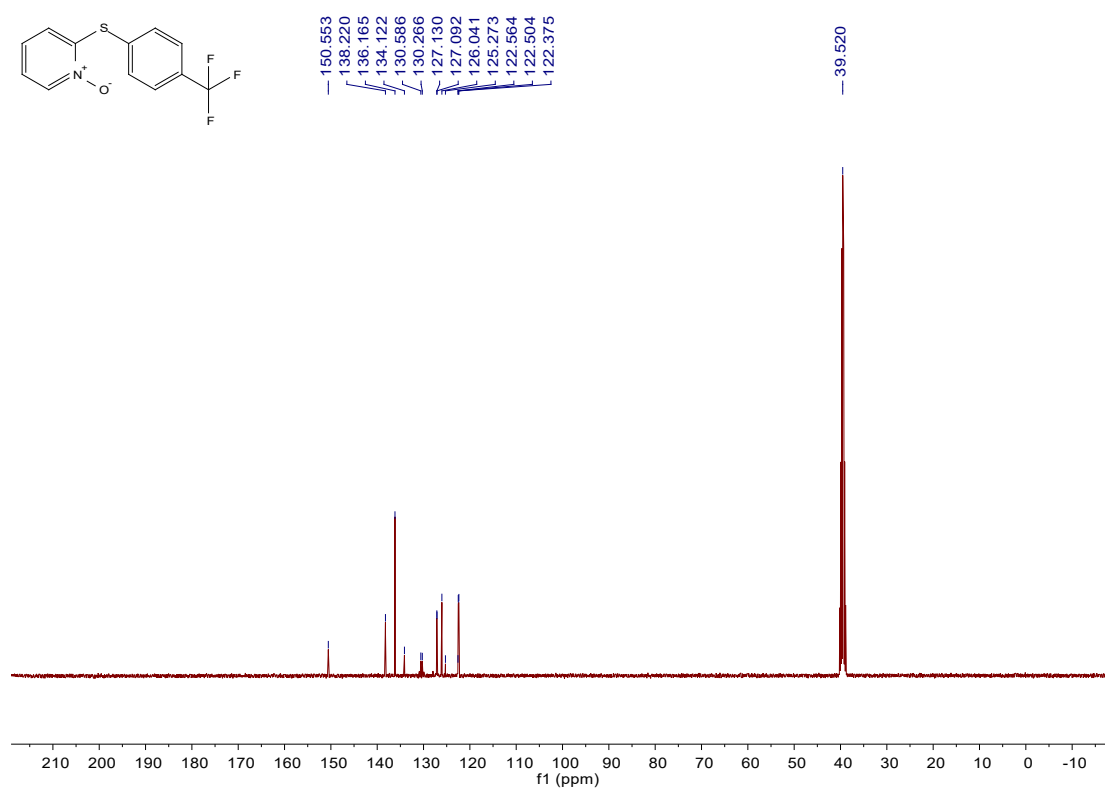

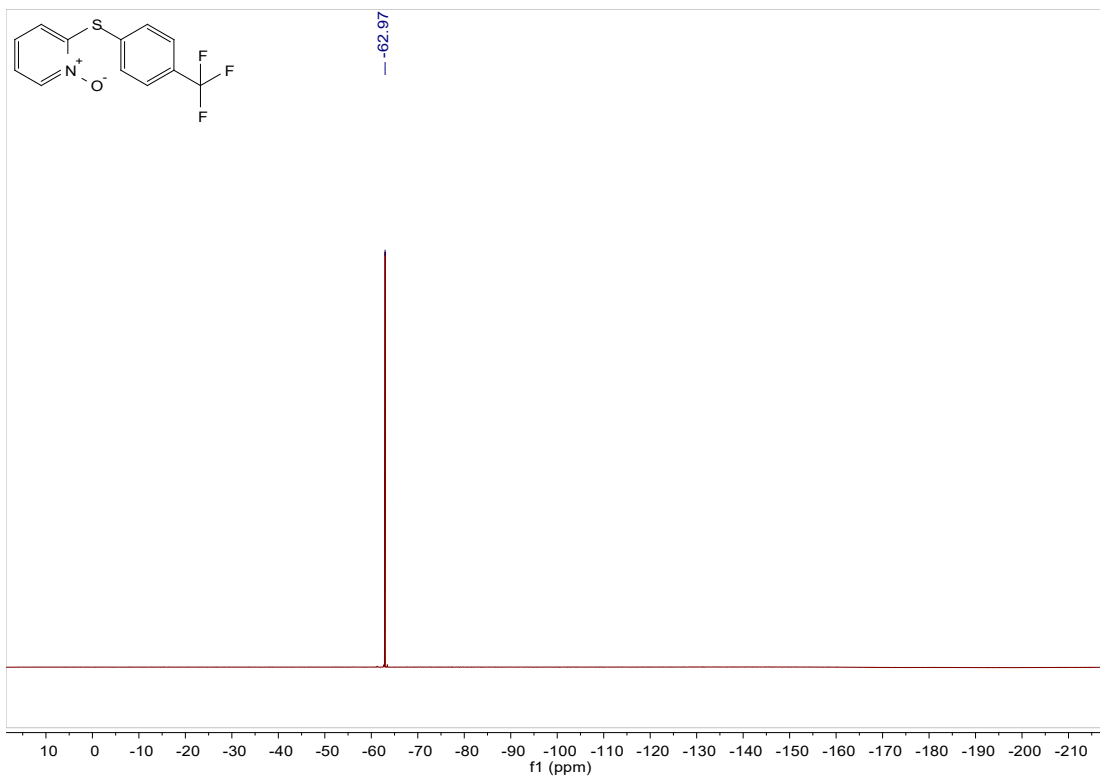

2-((3-(Diethoxymethyl)phenyl)thio)pyridine 1-oxide (**30**)

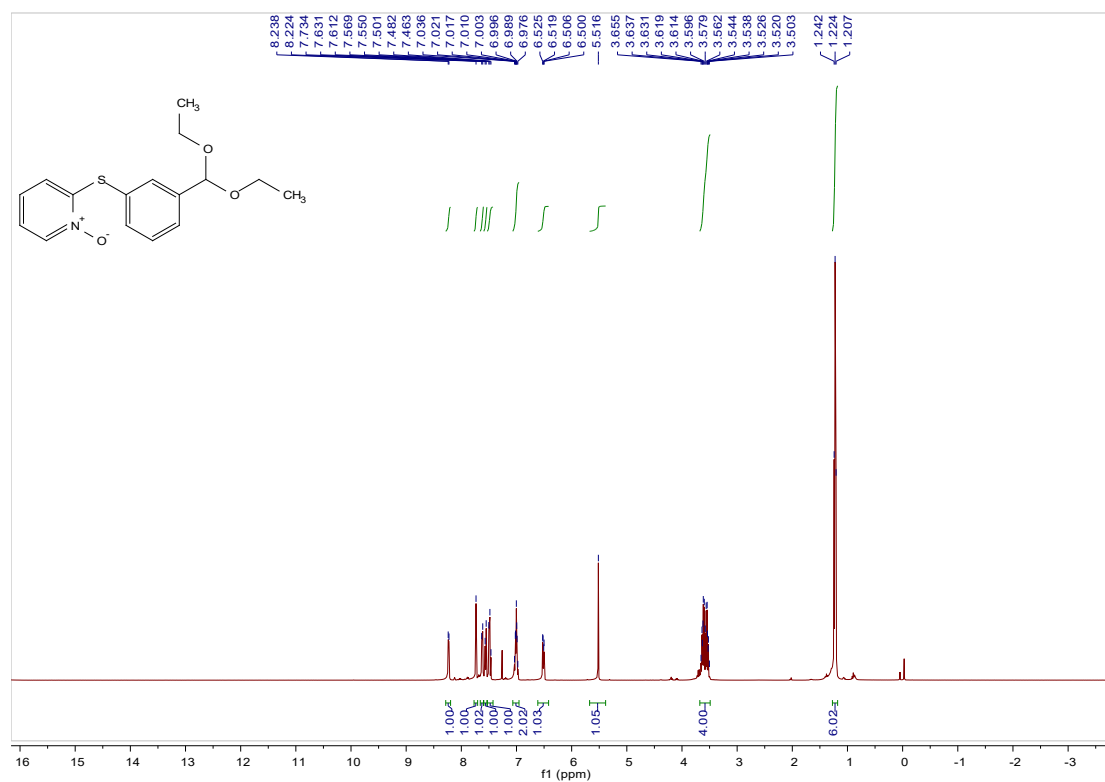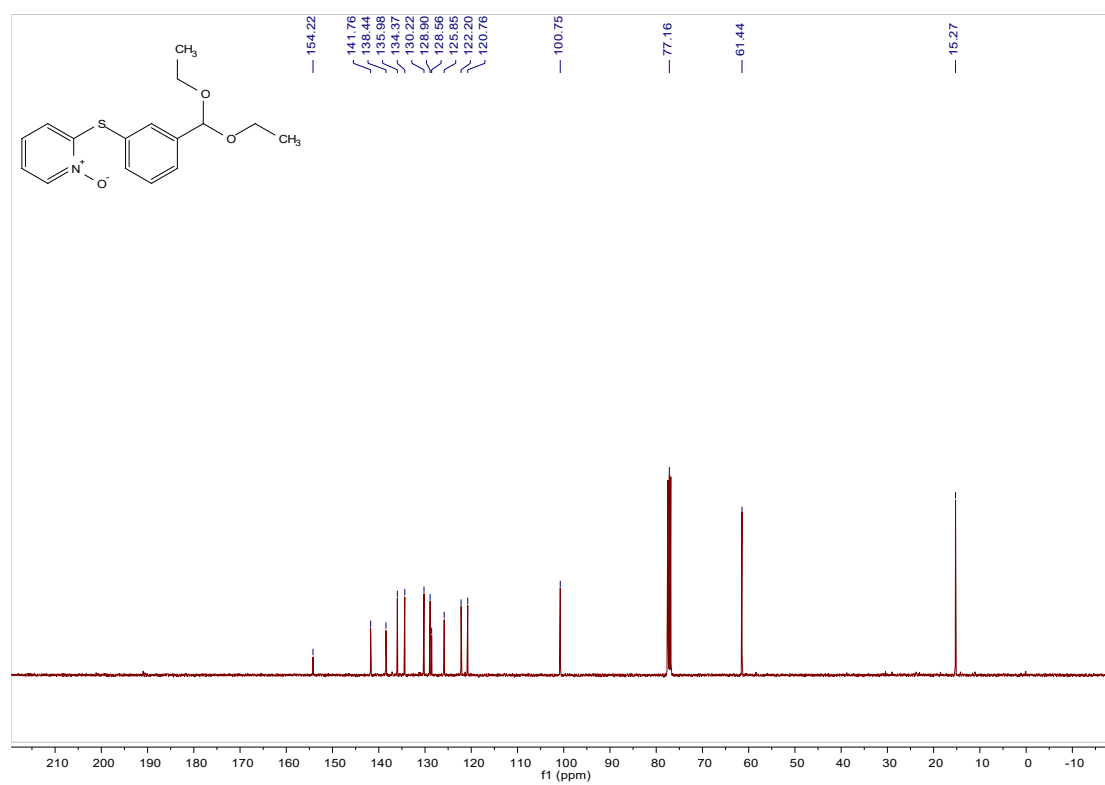

## 2-((3-Formylphenyl)thio)pyridine 1-oxide (**3p**)

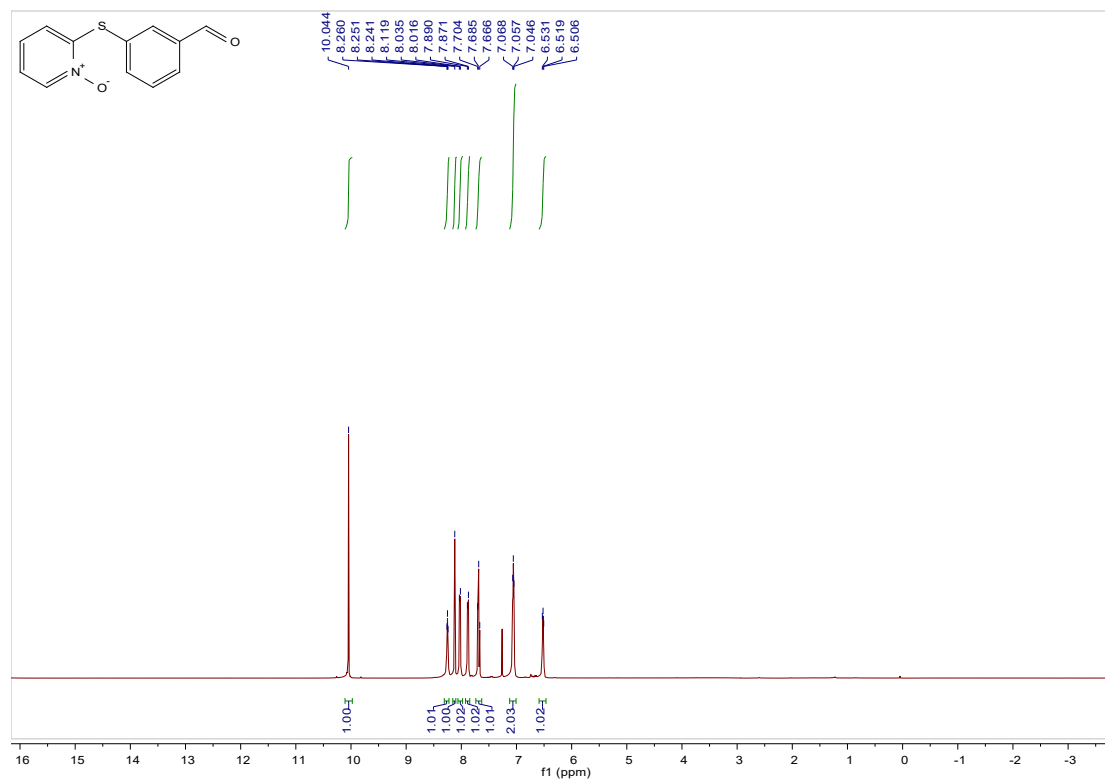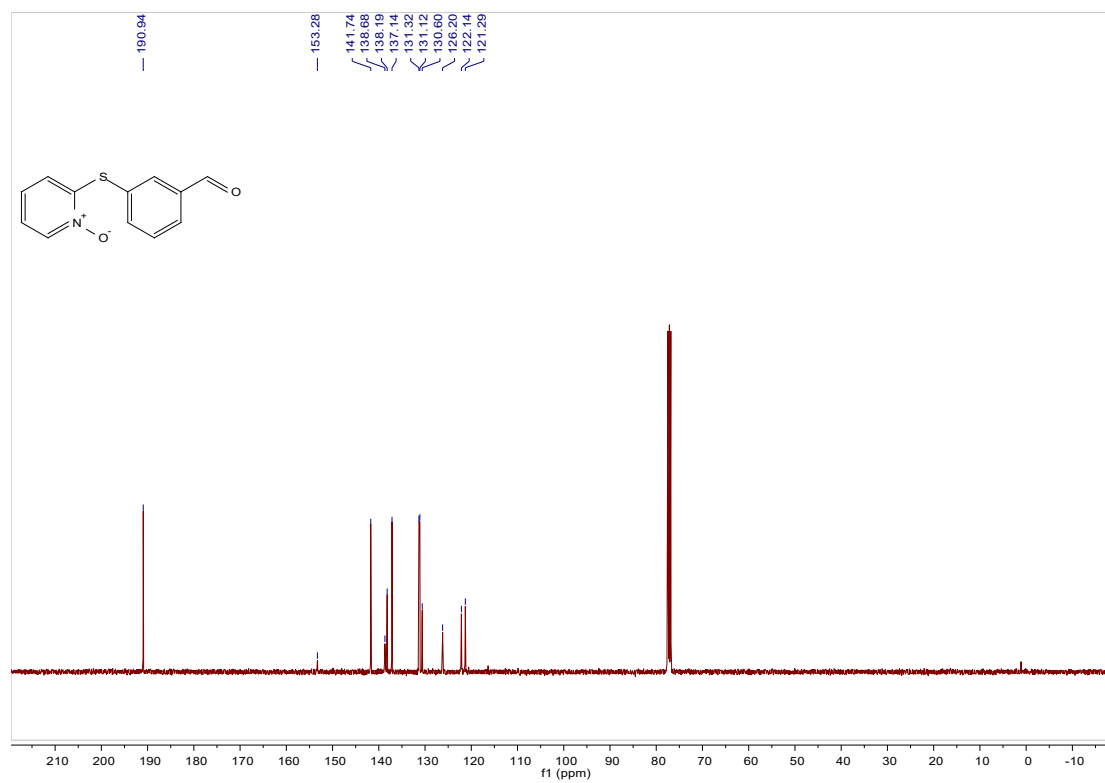



## 2-(Naphthalen-1-ylthio)pyridine 1-oxide (3q)

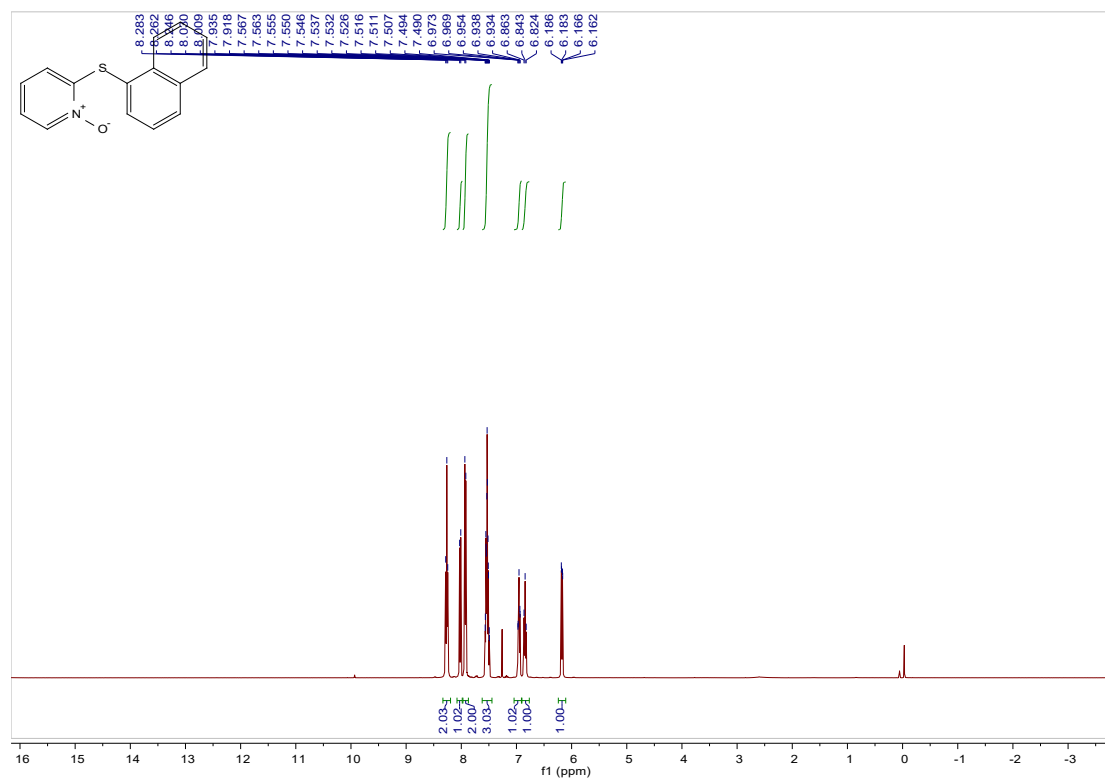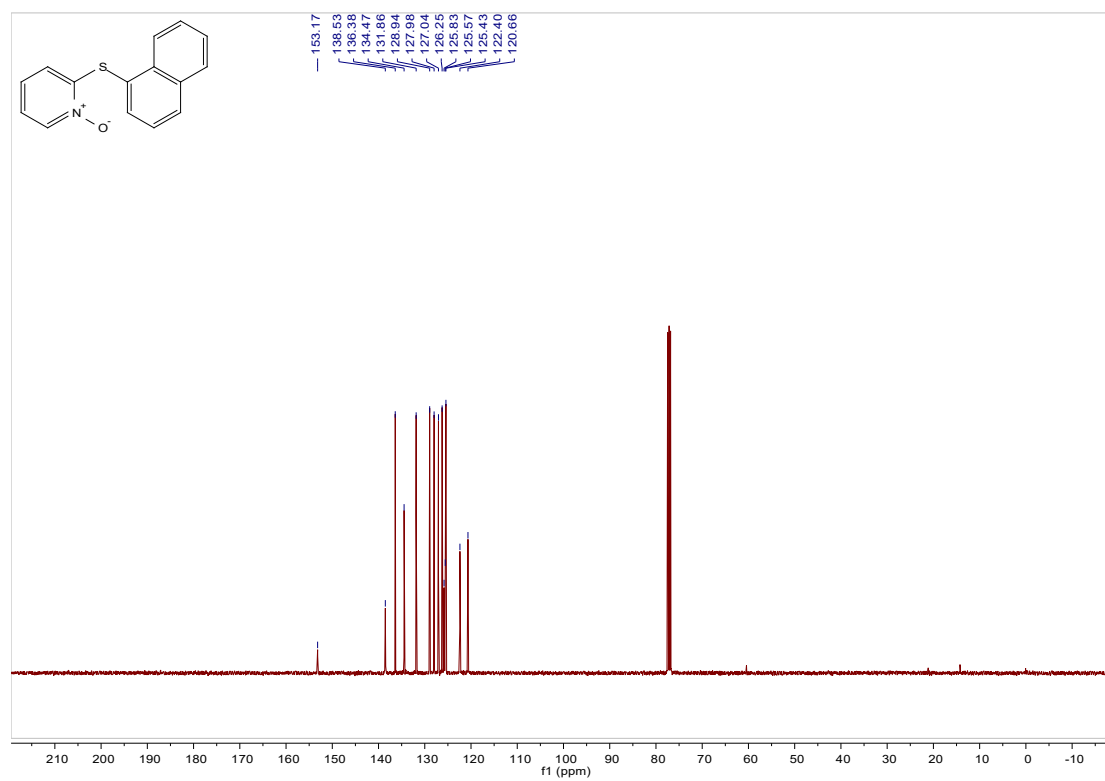

## 2-(Phenylthio)aniline (**6a**)

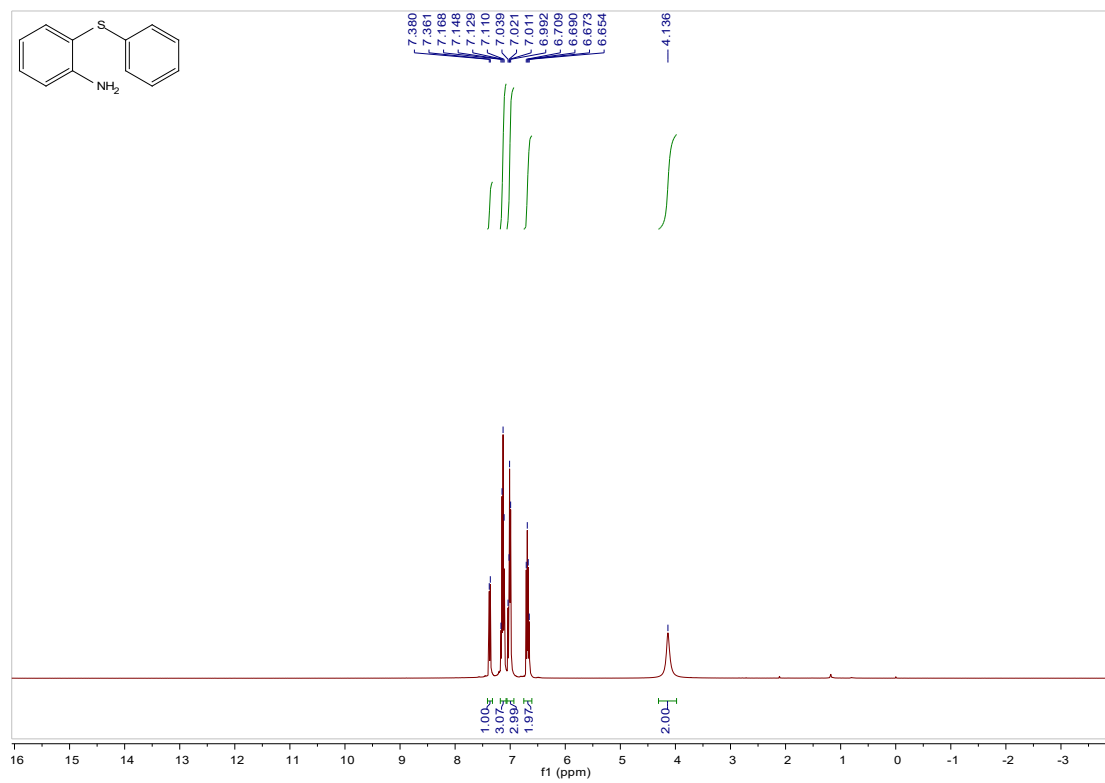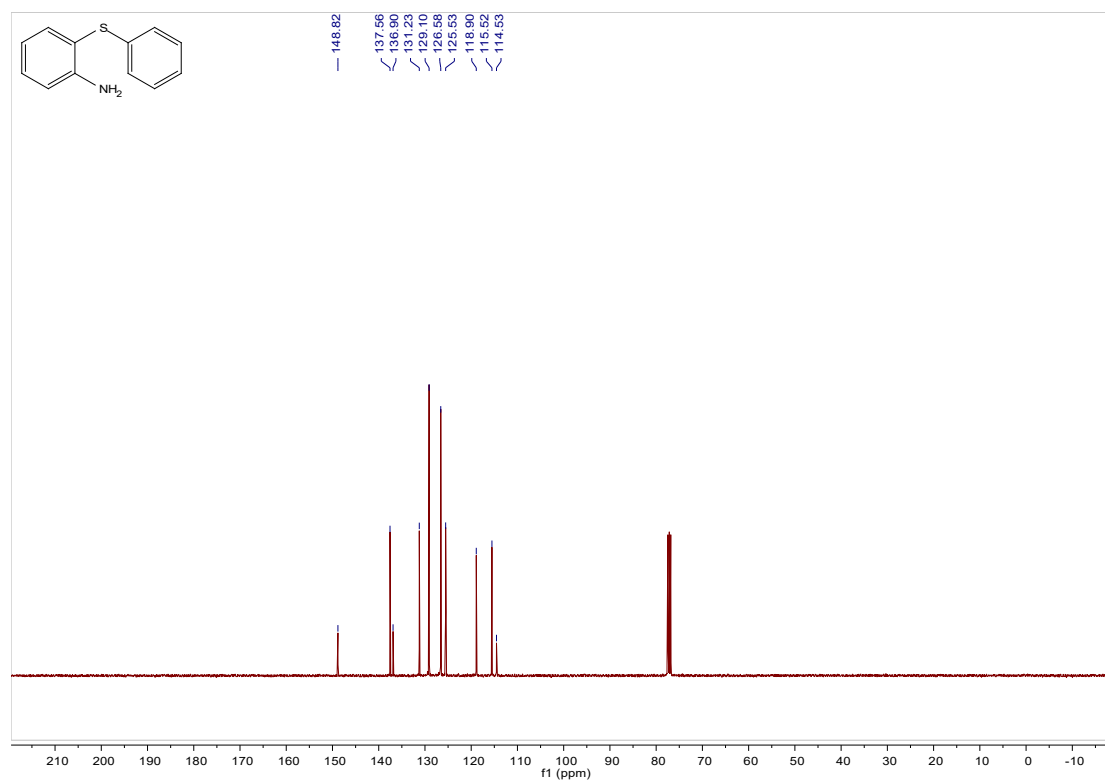

## 2-((3-Methoxyphenyl)thio)aniline (**6b**)

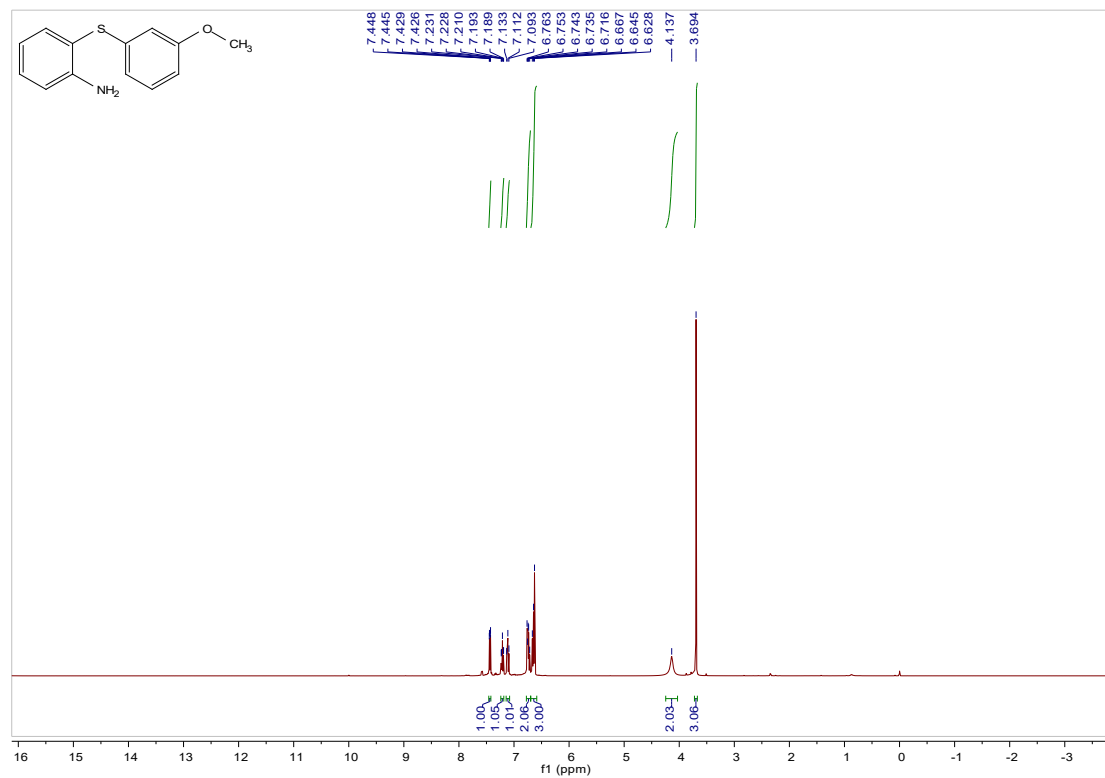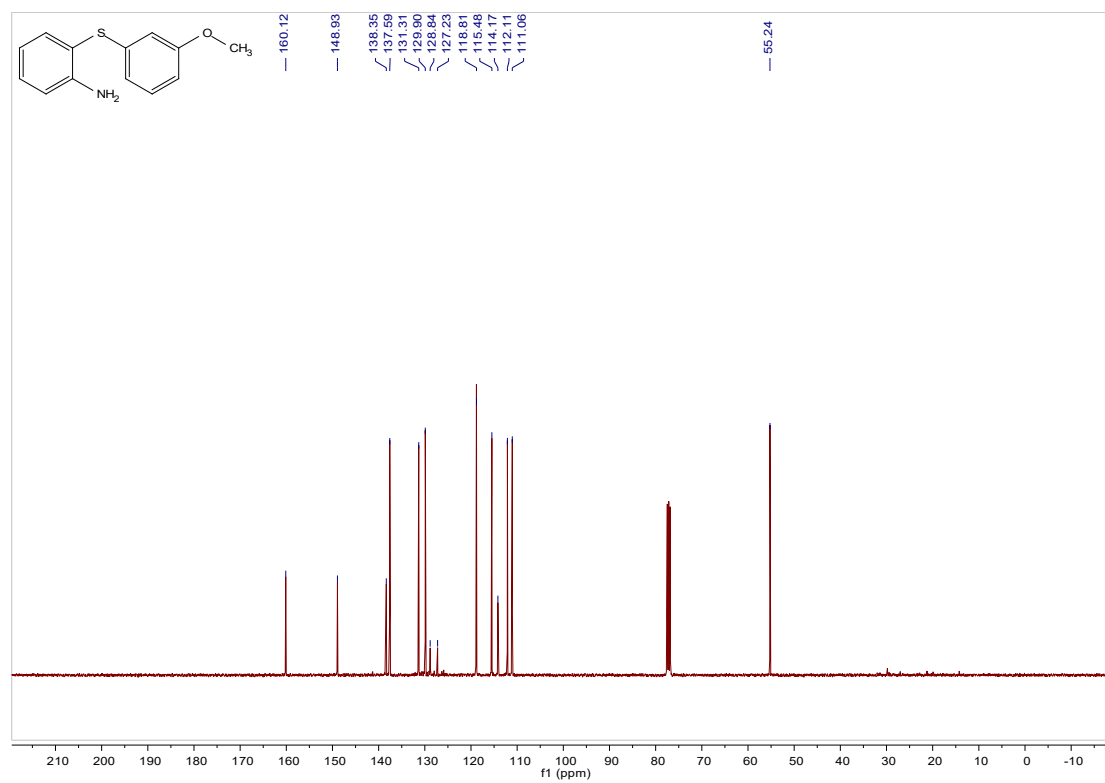

## 2-((4-Chlorophenyl)thio)aniline (**6c**)

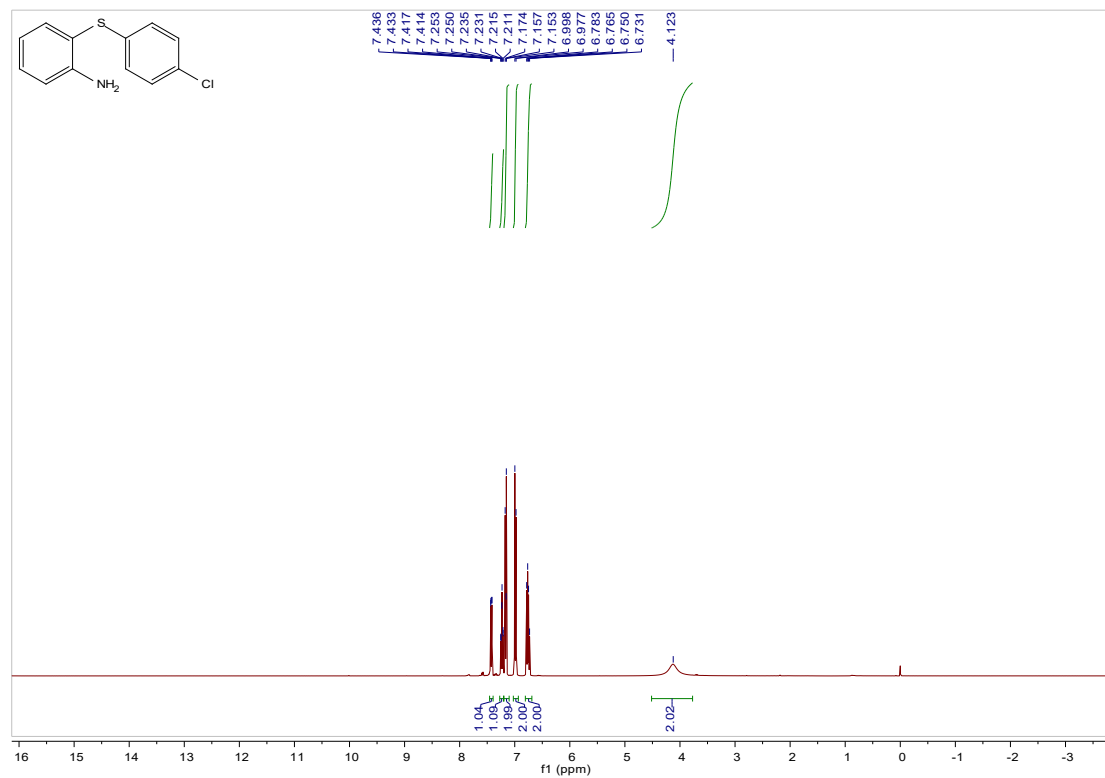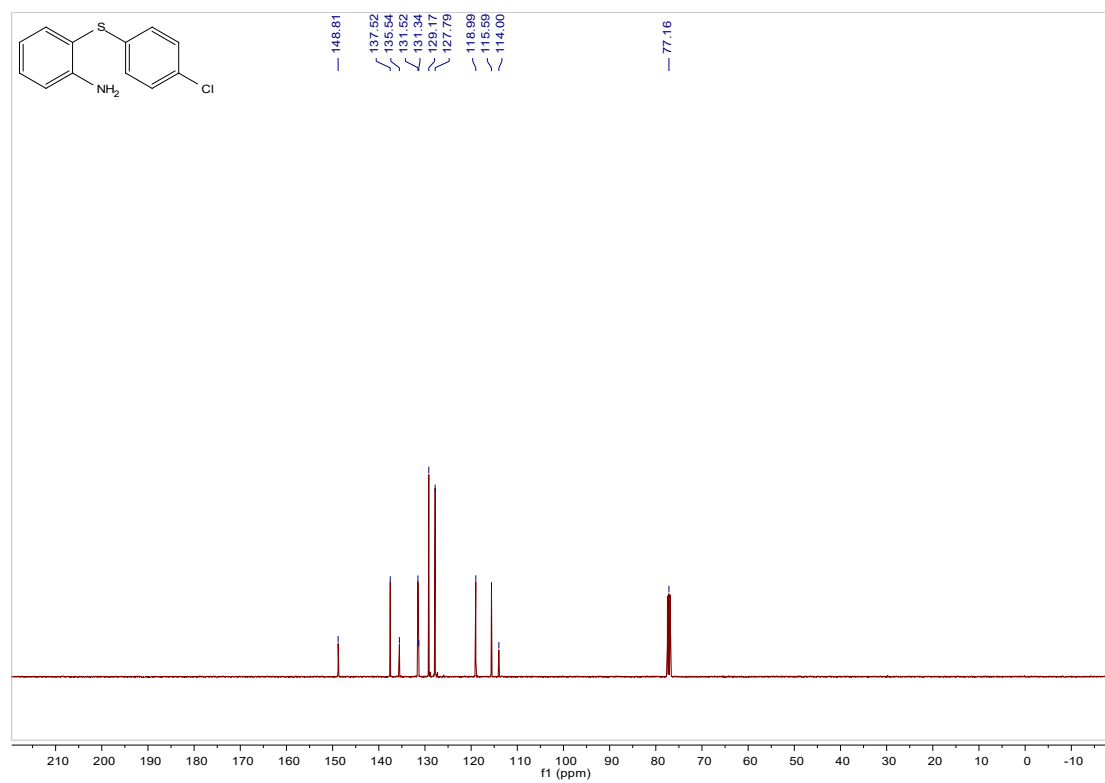

## 2-((4-(Trifluoromethyl)phenyl)thio)aniline (**6d**)

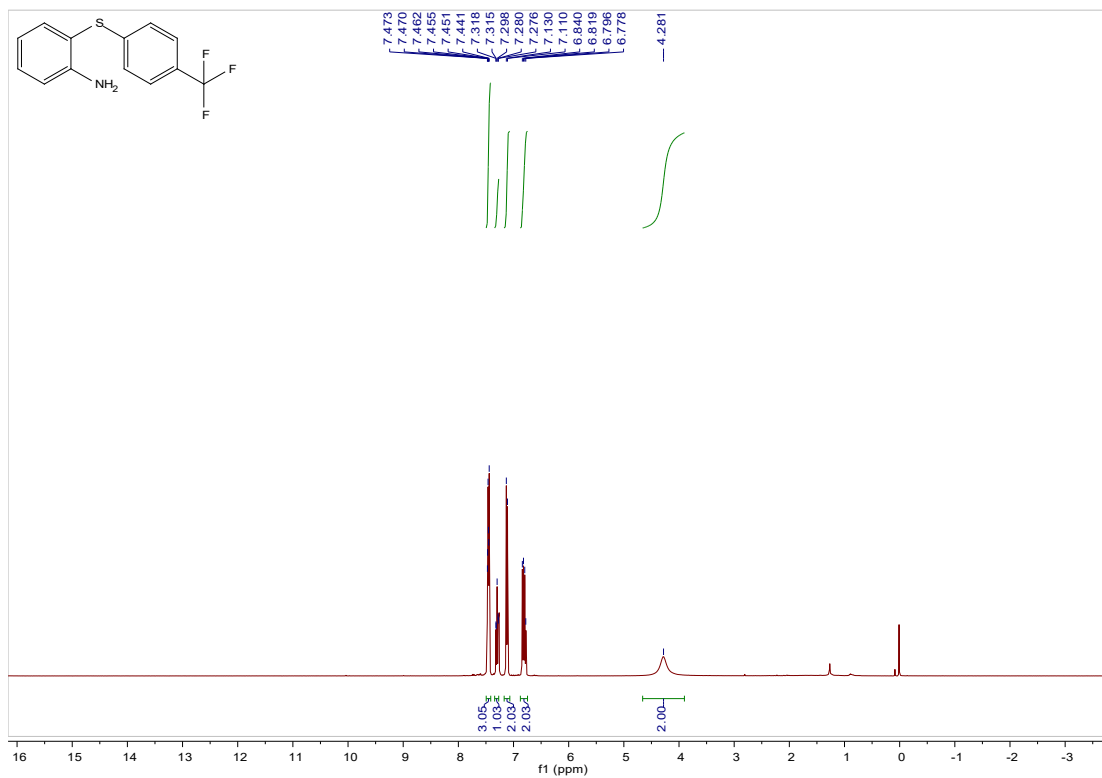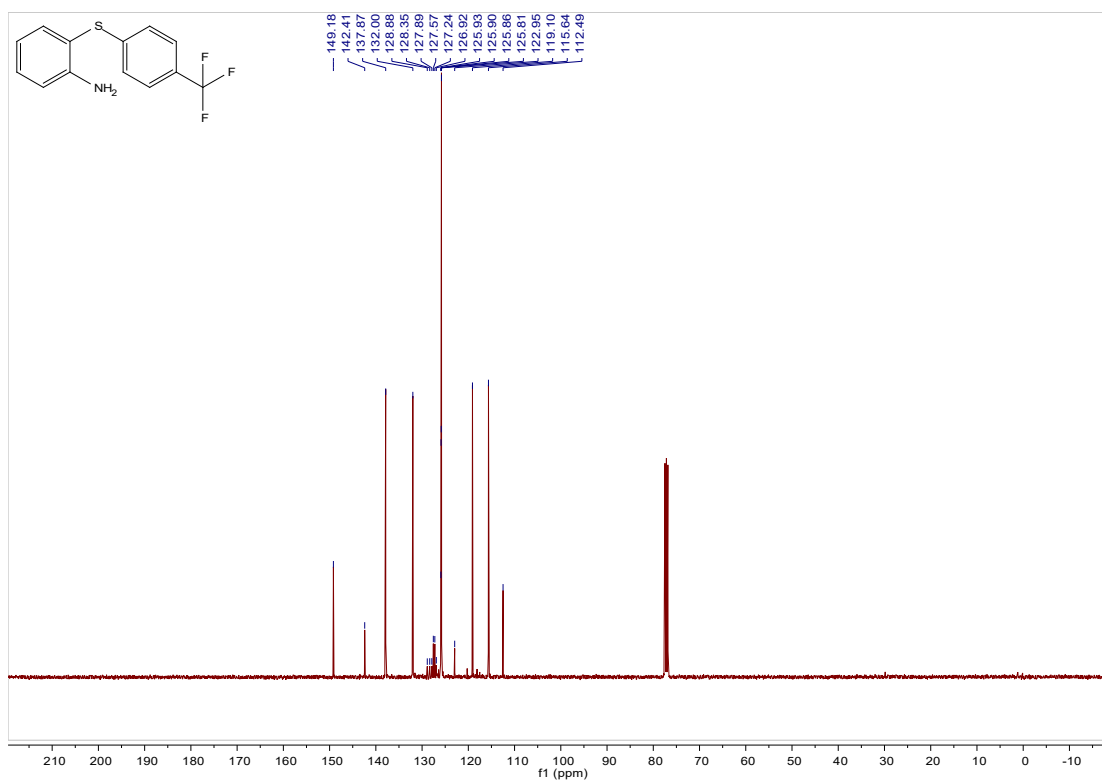

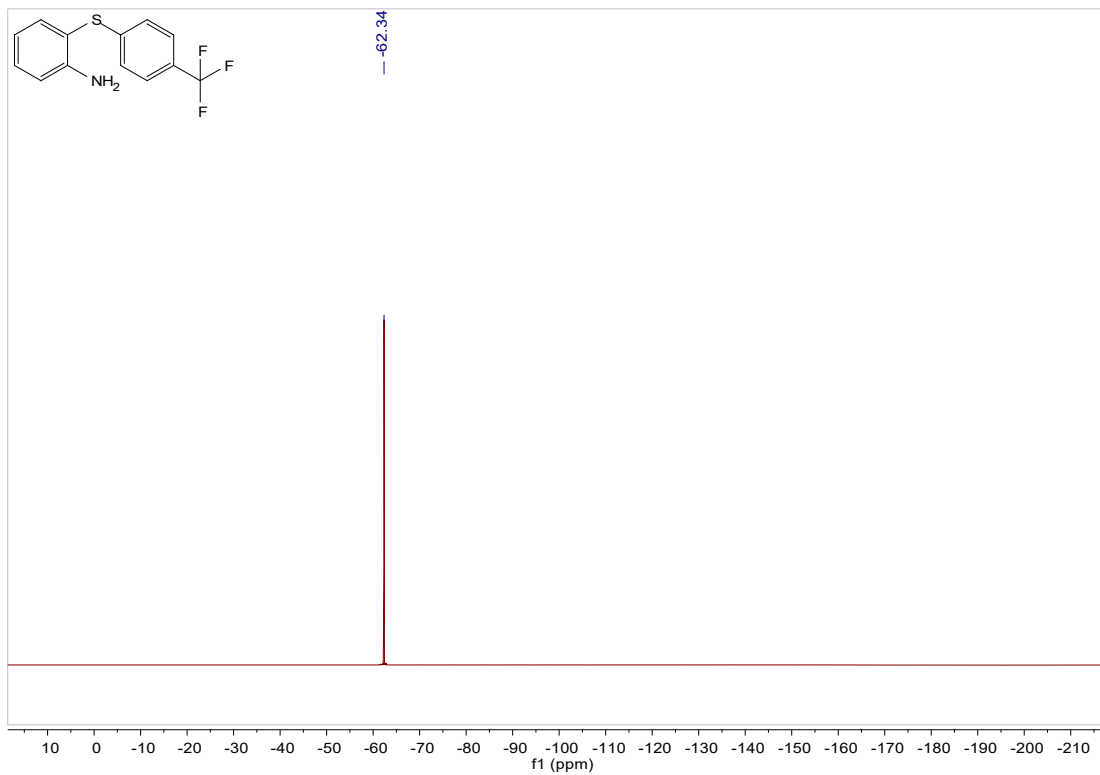

### 3-((3-Methoxyphenyl)thio)aniline (**6e**)

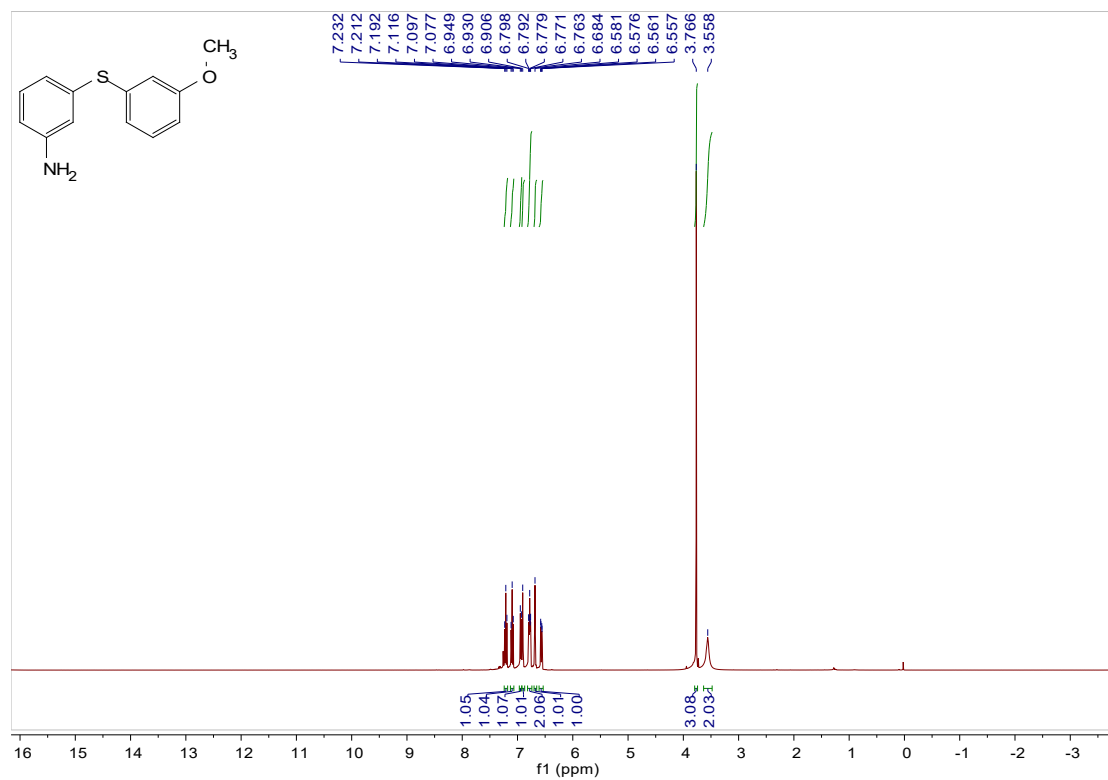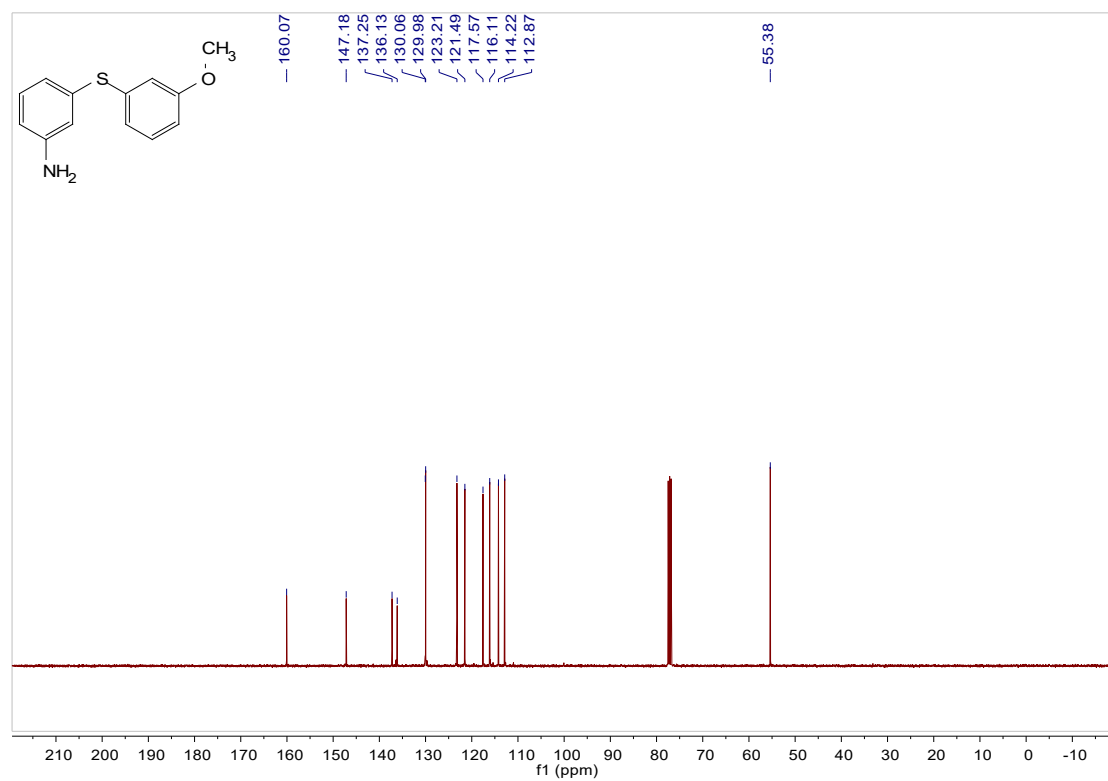

# 4-(Phenylthio)aniline (**6f**)

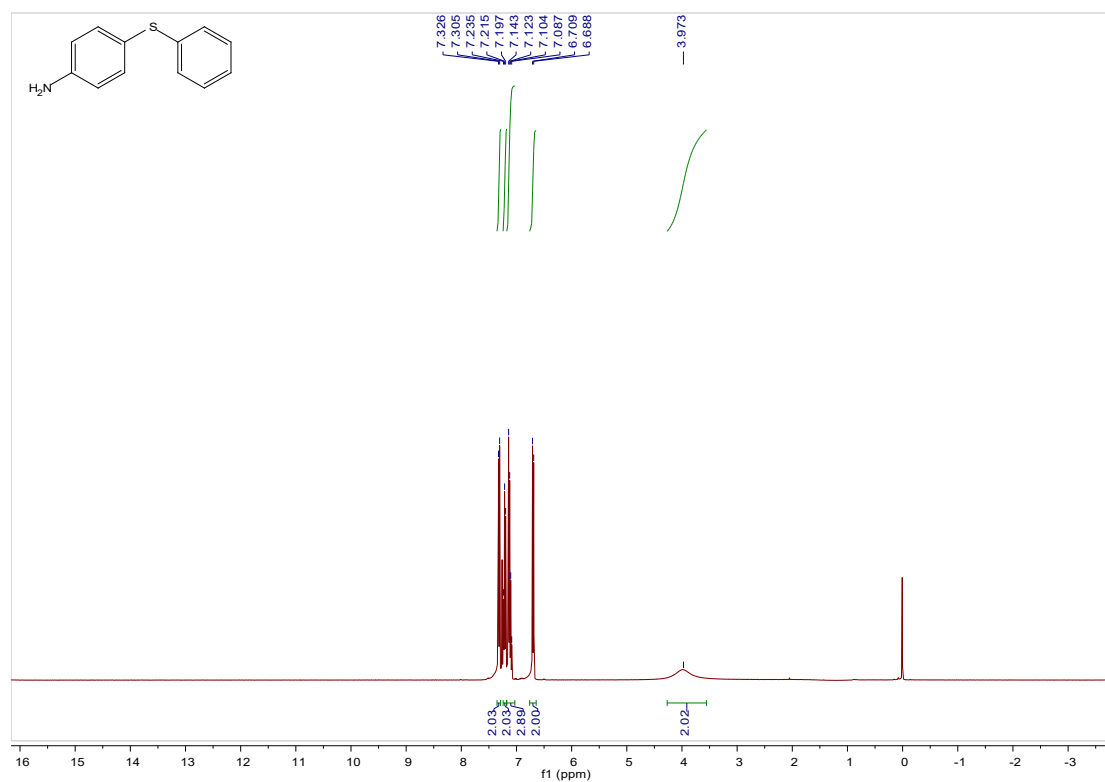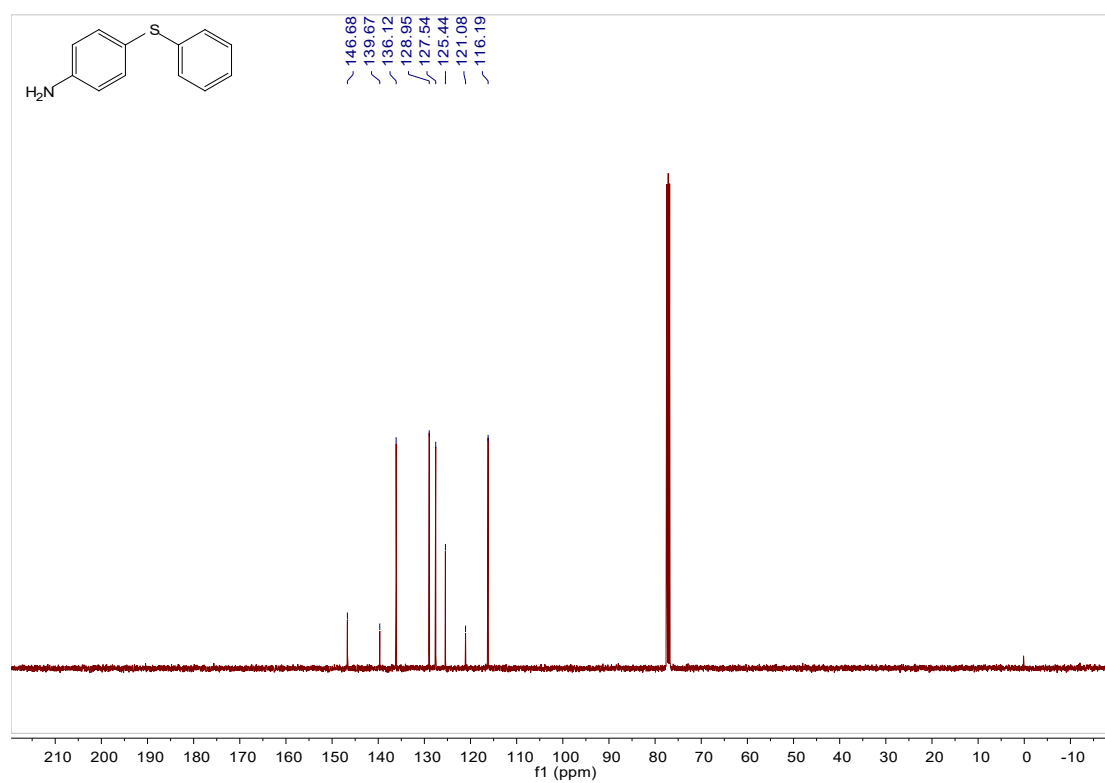



## 2-(Phenylthio)phenol (7a)

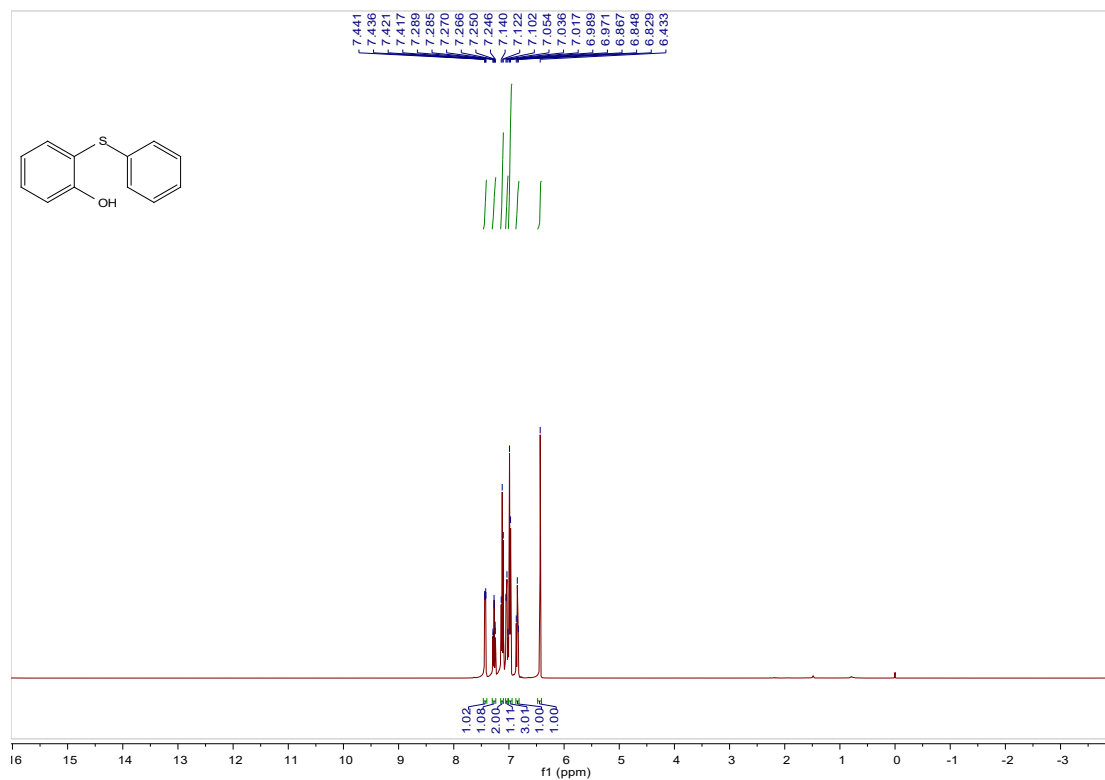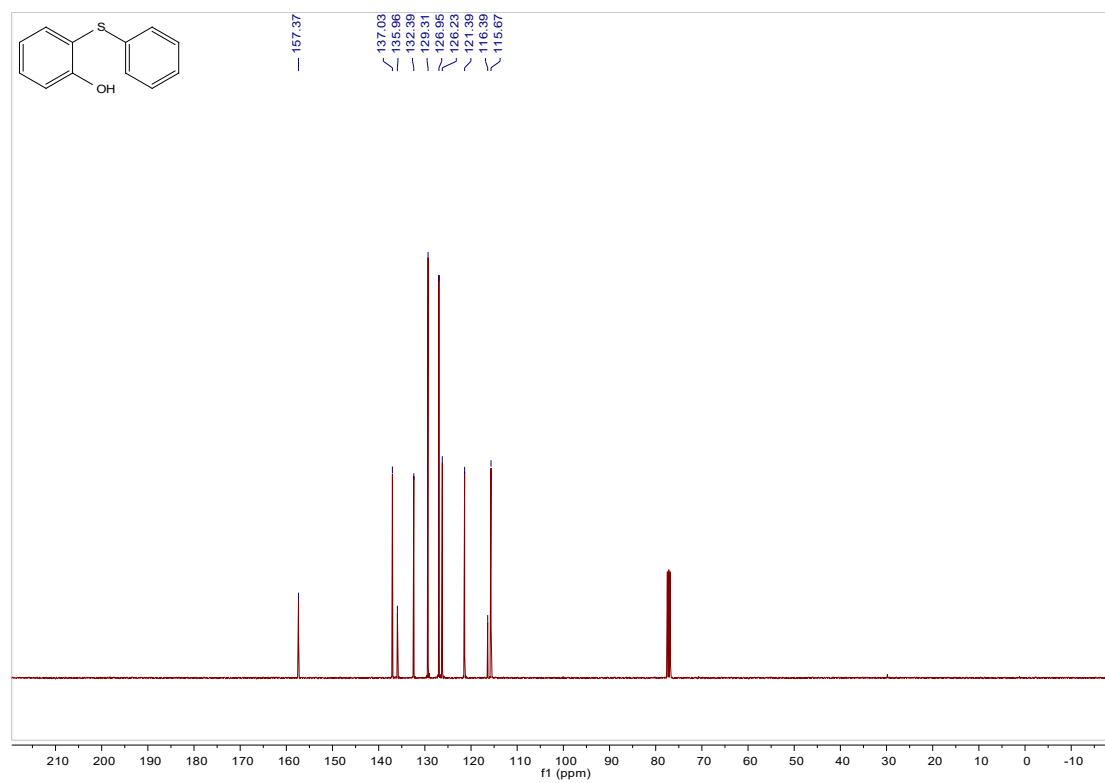

## 2-(p-tolylthio)phenol (**7b**)

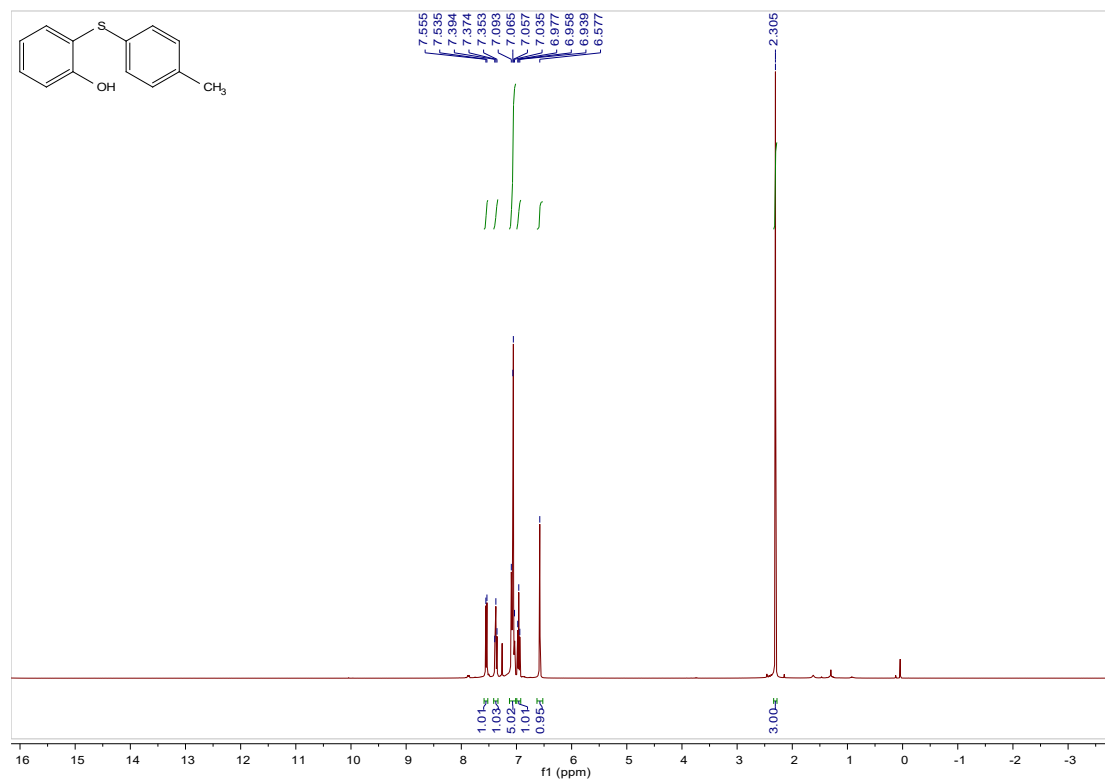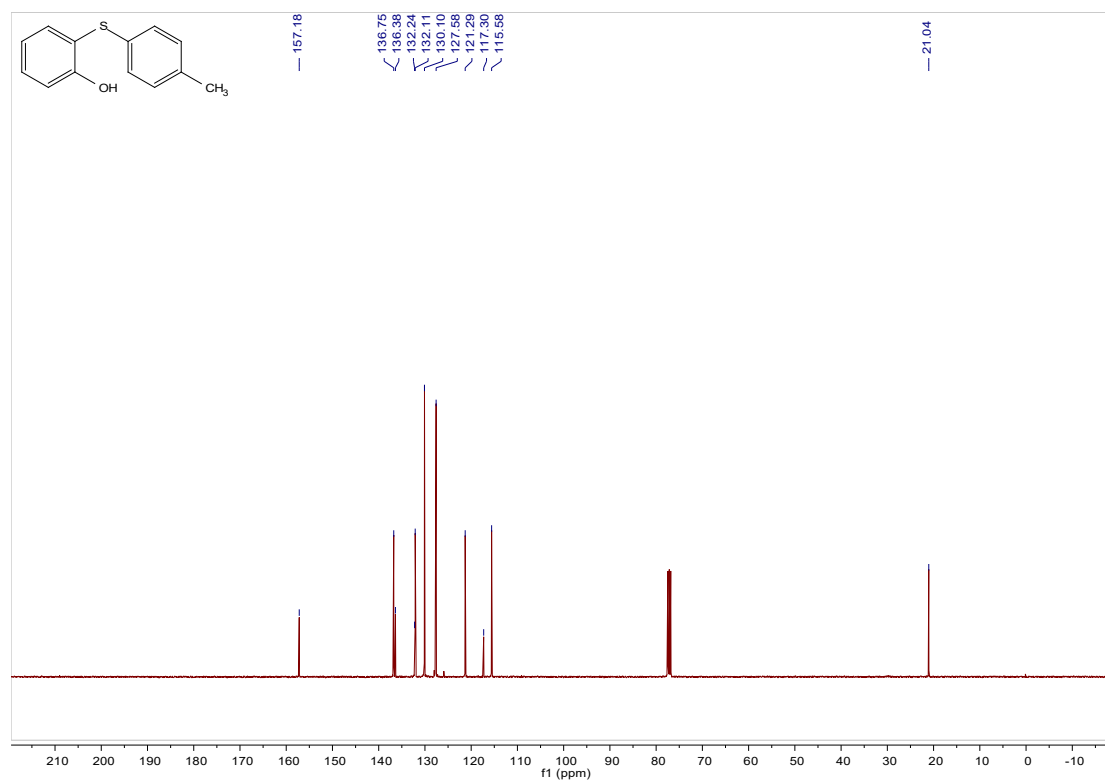

## 2-((2-Methoxyphenyl)thio)phenol (7c)

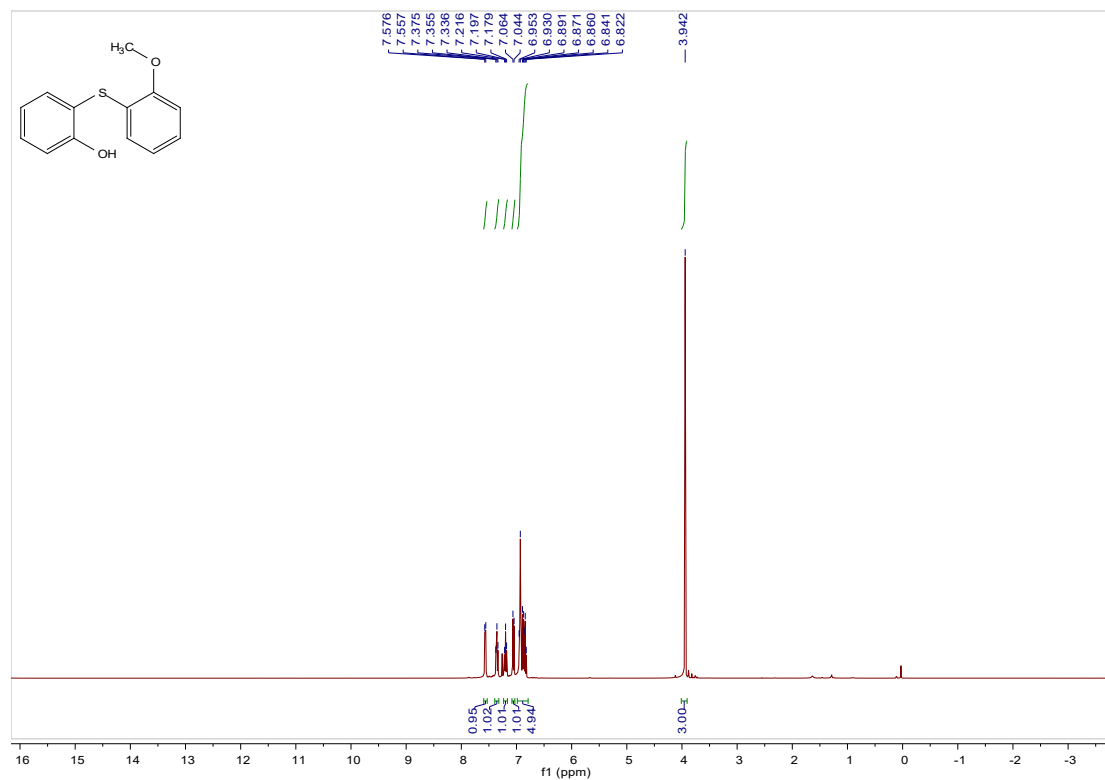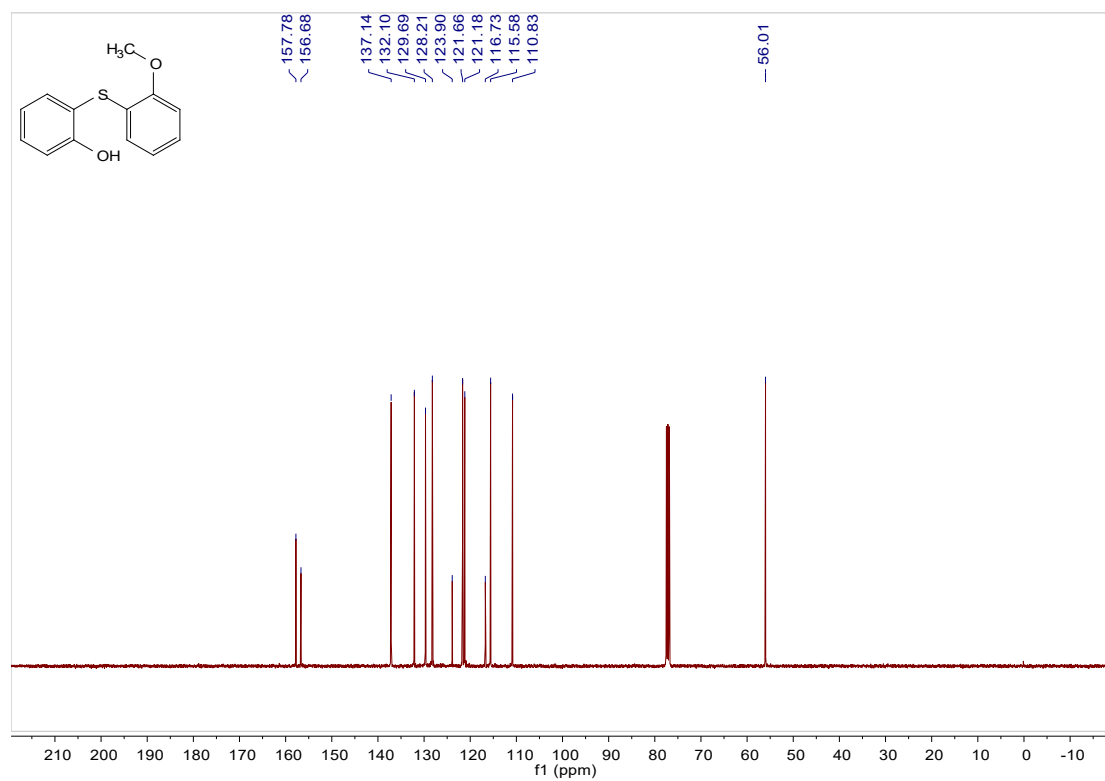

## 2-((4-Chlorophenyl)thio)phenol (**7d**)

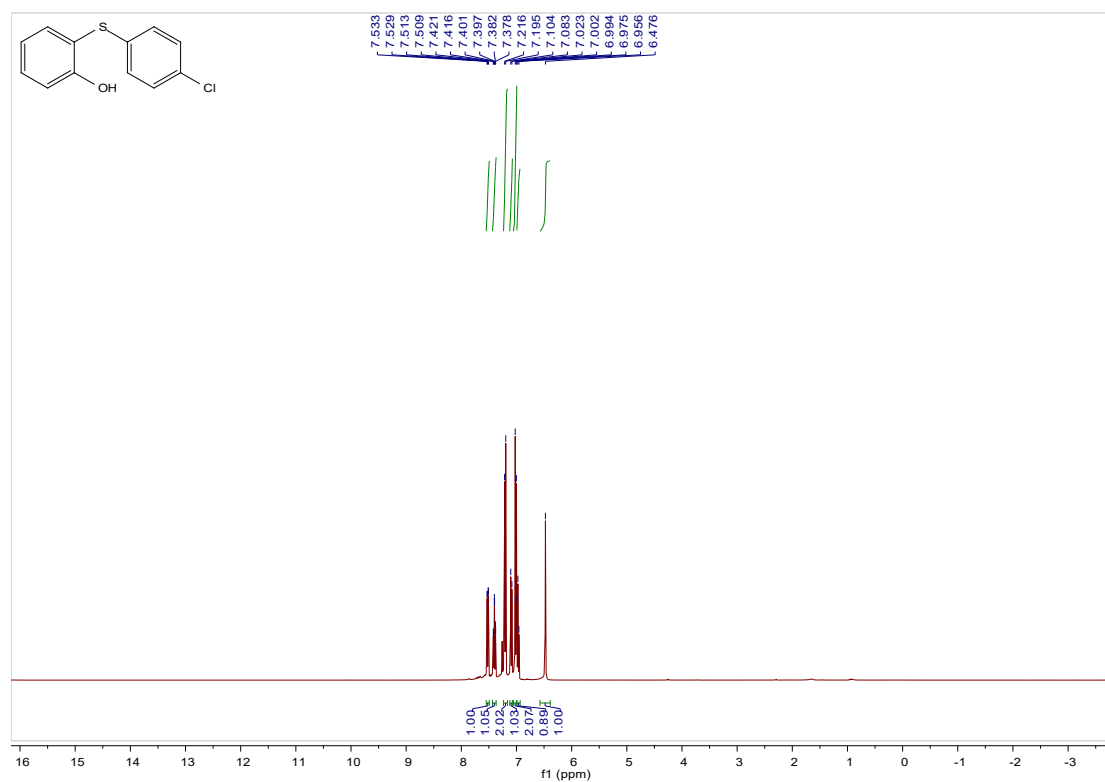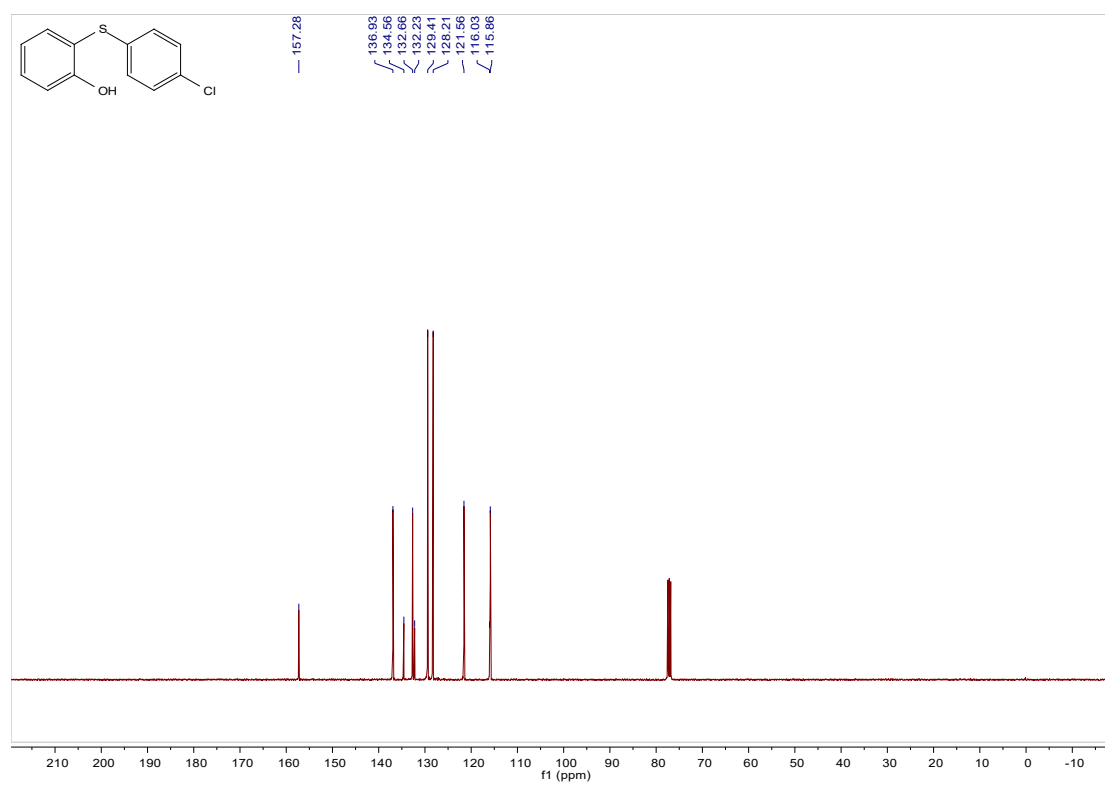

2-((3-Fluorophenyl)thio)phenol (**7e**)

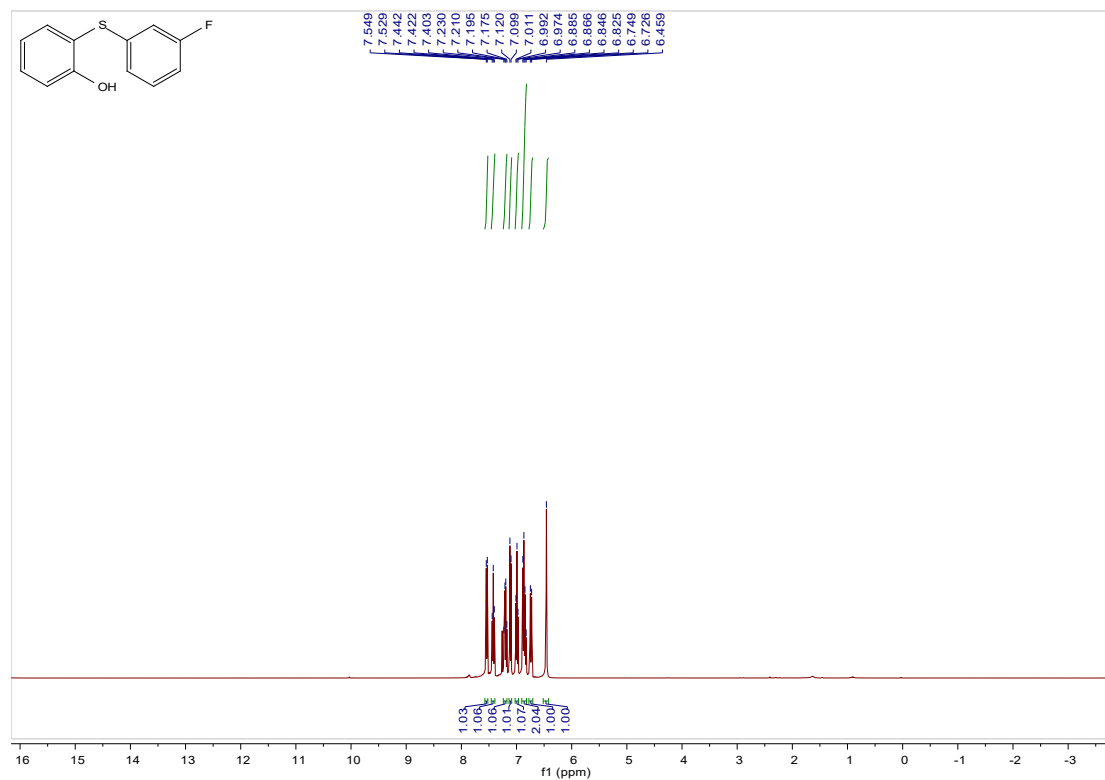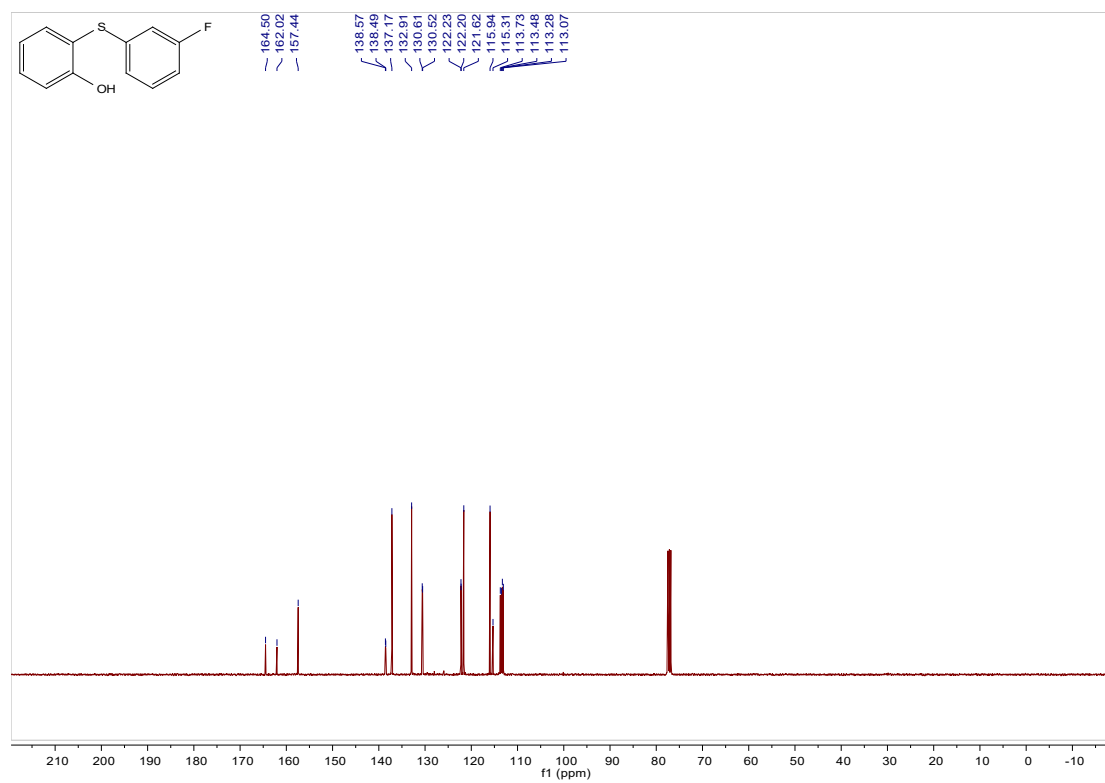

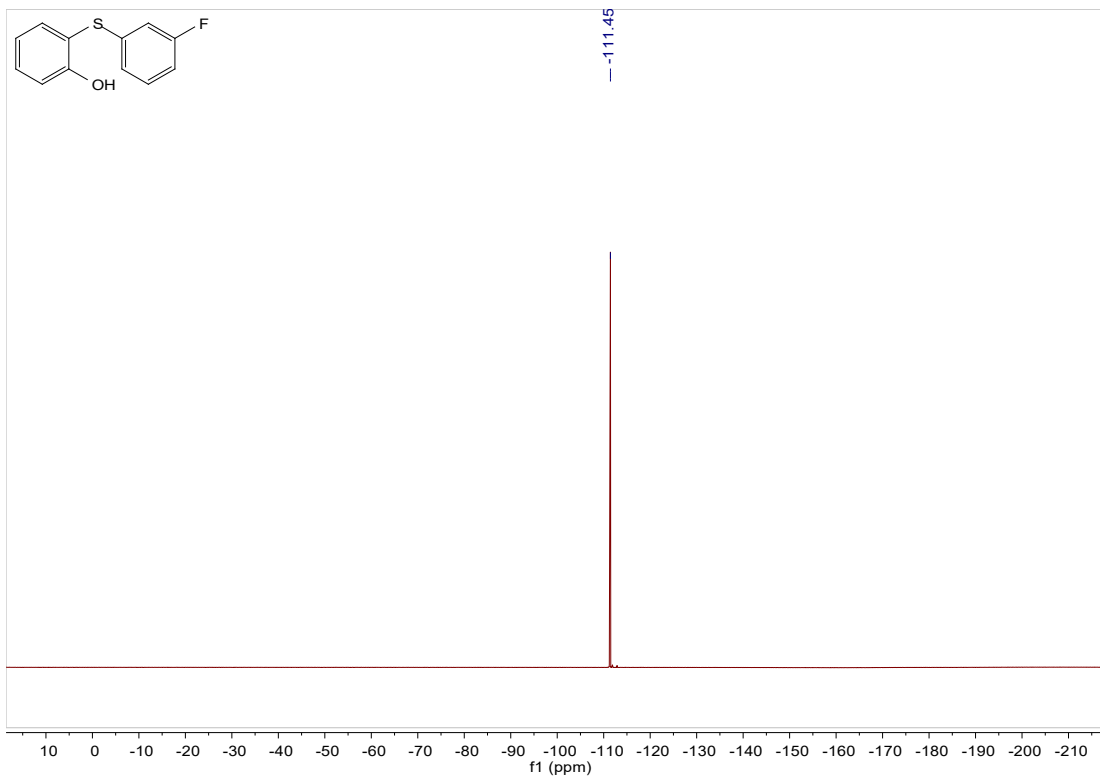

### 3-(Phenylthio)phenol (**7f**)

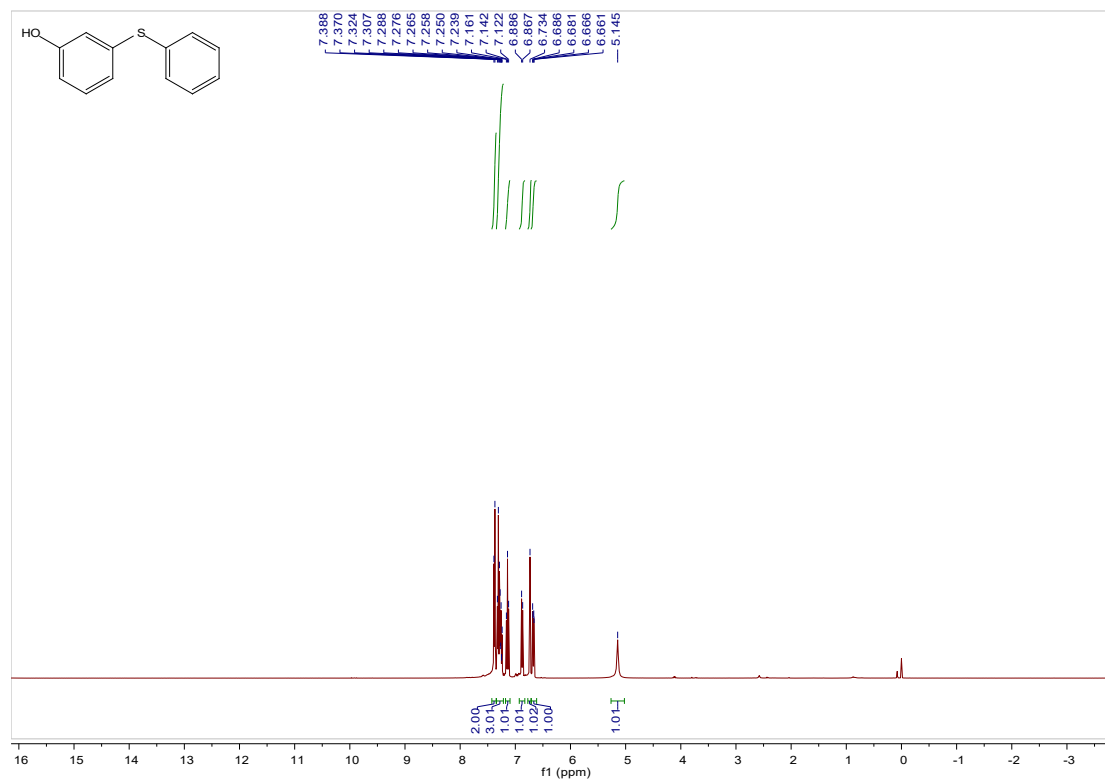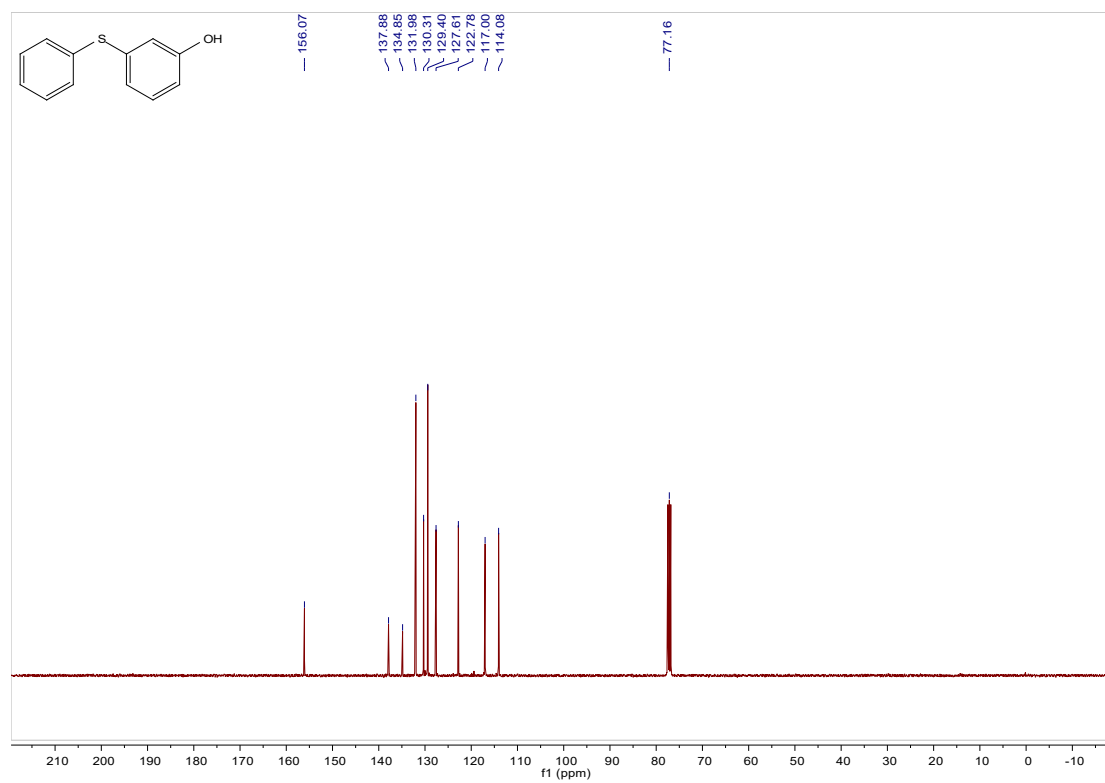

# 4-(Phenylthio)phenol (7g)

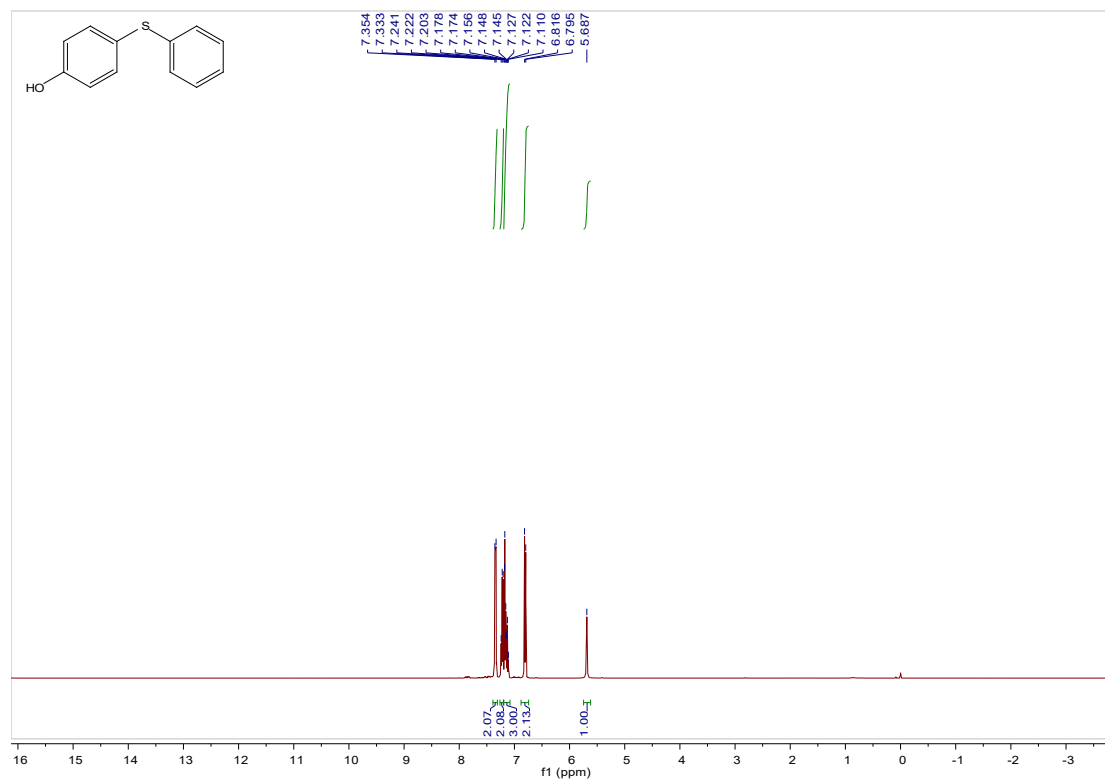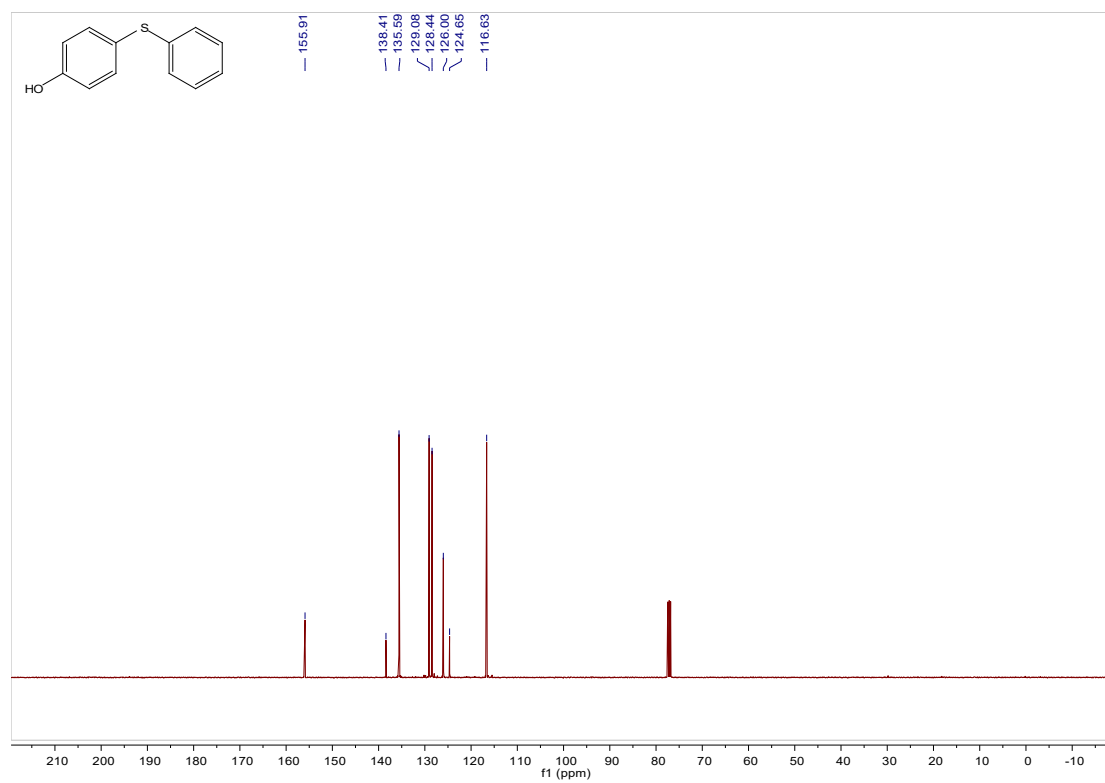

Supplement: d3ra06582k1.pdf [file d3ra06582k1.pdf]
